# Supplementary material for: Characteristics of Biopeptides Released In Silico from Collagens Using Quantitative Parameters
Source: Foods. 2020 Jul 21;9(7):965. doi: 10.3390/foods9070965 (PMC7404701; doi:10.3390/foods9070965)
Supplement: Supplementary file 1 [file foods-09-00965-s001.pdf]

# Characteristics of biopeptides released *in silico* from collagens using quantitative parameters

Anna Iwaniak\*, Piotr Minkiewicz, Monika Pliszka, Damir Mogut, Małgorzata Darewicz

## Supplement

**Table S1.** SMILES strings and structures of peptides with ionized acidic and basic groups.

| Sequence | BIOPEP-<br>UWM ID <sup>1</sup>              | SMILES <sup>2</sup>                                                           | Structure                                                                            |
|----------|---------------------------------------------|-------------------------------------------------------------------------------|--------------------------------------------------------------------------------------|
| PGL      | <a href="#">7507</a>                        | <chem>[H][C@@](CC(C)C)(NC(=O)CNC(=O)[C@]1([H])CCC[NH2+])1)C([O-])=O</chem>    | 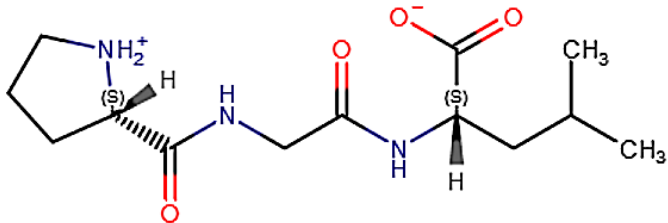  |
| RL       | <a href="#">3257</a> ; <a href="#">8886</a> | <chem>[H][C@]([NH3+])(CCNC(N)=[NH2+])C(=O)N[C@@]([H])(CC(C)C)C([O-])=O</chem> | 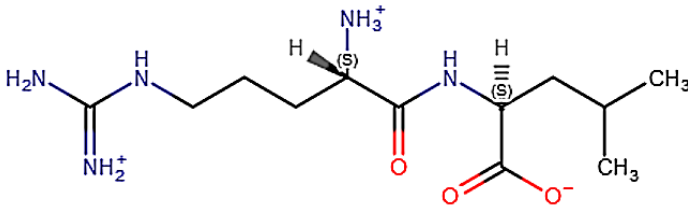 |

|    |                                                                                              |                                                                                 |  |
|----|----------------------------------------------------------------------------------------------|---------------------------------------------------------------------------------|--|
| GF | <a href="#">7591</a> ; <a href="#">8782</a> ;<br><a href="#">9488</a>                        | <chem>[H][C@@](Cc1ccccc1)(NC(=O)C[NH3+])C([O-])=O</chem>                        |  |
| SF | <a href="#">7685</a> ; <a href="#">8891</a> ;<br><a href="#">9432</a>                        | <chem>[H][C@]([NH3+])(CO)C(=O)N[C@@]([H])(Cc1ccccc1)C([O-])=O</chem>            |  |
| TF | <a href="#">8185</a> ; <a href="#">8900</a> ;<br><a href="#">9471</a> ; <a href="#">9486</a> | <chem>[H][C@](C)(O)[C@]([H])([NH3+])C(=O)N[C@@]([H])(Cc1ccccc1)C([O-])=O</chem> |  |
| QF | <a href="#">8870</a> ; <a href="#">9431</a>                                                  | <chem>[H][C@]([NH3+])(CCC(N)=O)C(=O)N[C@@]([H])(Cc1ccccc1)C([O-])=O</chem>      |  |

|    |                      |                                                                                    |                                                                                     |
|----|----------------------|------------------------------------------------------------------------------------|-------------------------------------------------------------------------------------|
| DF | <a href="#">9074</a> | <chem>[H][C@]([NH3+])(CC([O-])=O)C(=O)N[C@@]([H])(Cc1ccccc1)C([O-])=O</chem>       | 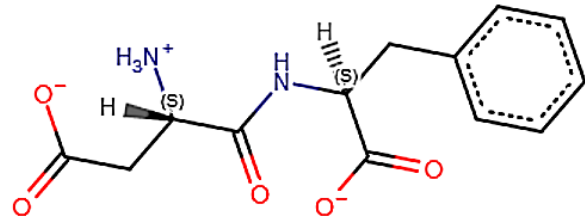 |
| DR | <a href="#">8769</a> | <chem>[H][C@]([NH3+])(CC([O-])=O)C(=O)N[C@@]([H])(CCCNC(N)=[NH2+])C([O-])=O</chem> | 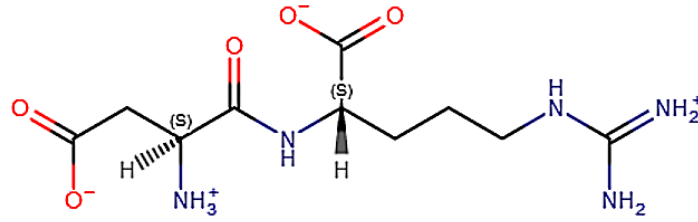 |
| GR | <a href="#">7603</a> | <chem>[H][C@@](CCCNC(N)=[NH2+])(NC(=O)C[NH3+])C([O-])=O</chem>                     | 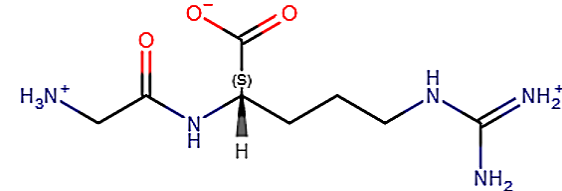 |

1. This column contains links to peptide data in the BIOPEP-UWM database.
2. Blue – positively charged basic groups, red – negatively charged acidic group

**Table S2.** Predicted targets for PGL peptide. Red font indicates 15 most likely targets.

| Order: | "Target","Common name","Uniprot ID","ChEMBL ID","Target Class","Probability"                                              |
|--------|---------------------------------------------------------------------------------------------------------------------------|
| 1      | Dipeptidyl peptidase IV,"DPP4","P27487","CHEMBL284","Protease","0.526361274524"                                           |
| 2      | Angiotensin-converting enzyme,"ACE","P12821","CHEMBL1808","Protease","0.444639417769"                                     |
| 3      | Cyclooxygenase-2,"PTGS2","P35354","CHEMBL230","Oxidoreductase","0.420066875222"                                           |
| 4      | Inhibitor of apoptosis protein 3,"XIAP","P98170","CHEMBL4198","Other cytosolic protein","0.288928252457"                  |
| 5      | Calpain 1,"CAPN1","P07384","CHEMBL3891","Protease","0.190656977035"                                                       |
| 6      | Sodium/glucose cotransporter 1,"SLC5A1","P13866","CHEMBL4979","Electrochemical transporter","0.17427075329"               |
| 7      | HLA class I histocompatibility antigen A-3,"HLA-A","P04439","CHEMBL2632","Surface antigen","0.157929217109"               |
| 8      | Leucine aminopeptidase,"LAP3","P28838","CHEMBL3965","Protease","0.133337961498",                                          |
| 9      | Cathepsin (B and K),"CTSB","P07858","CHEMBL4072","Protease","0.125142648574"                                              |
| 10     | Beta-secretase 1,"BACE1","P56817","CHEMBL4822","Protease","0.116965063224"                                                |
| 11     | Neprilysin (by homology),"MME","P08473","CHEMBL1944","Protease","0.116965063224"                                          |
| 12     | Protein farnesyltransferase,"FNTA FNTB","P49354 P49356","CHEMBL2094108","Enzyme","0.116965063224"                         |
| 13     | Pepsinogen C (by homology),"PGC","P20142","CHEMBL2136","Protease","0.108770969359"                                        |
| 14     | Lipoxin A4 receptor (by homology),"FPR2","P25090","CHEMBL4227","Family A G protein-coupled receptor","0.108770969359"     |
| 15     | NAD-dependent deacetylase sirtuin 2,"SIRT2","Q8IXJ6","CHEMBL4462","Eraser","0.108770969359"                               |
| 16     | NAD-dependent deacetylase sirtuin 1,"SIRT1","Q96EB6","CHEMBL4506","Eraser","0.108770969359"                               |
| 17     | Neurotensin receptor 1 (by homology),"NTSR1","P30989","CHEMBL4123","Family A G protein-coupled receptor","0.108770969359" |
| 18     | Xaa-Pro dipeptidase,"PEPD","P12955","CHEMBL4185","Protease","0.108770969359"                                              |
| 19     | Dopamine D2 receptor,"DRD2","P14416","CHEMBL217","Family A G protein-coupled receptor","0.108770969359"                   |
| 20     | Baculoviral IAP repeat-containing protein 3,"BIRC3","Q13489","CHEMBL5335","Enzyme","0.100578902067"                       |
| 21     | Baculoviral IAP repeat-containing protein 2,"BIRC2","Q13490","CHEMBL5462","Enzyme","0.100578902067"                       |
| 22     | Neurotensin receptor 2,"NTSR2","O95665","CHEMBL2514","Family A G protein-coupled receptor","0.100578902067"               |
| 23     | Protein kinase C epsilon,"PRKCE","Q02156","CHEMBL3582","Kinase","0.100578902067"                                          |
| 24     | TRAIL receptor-1,"TNFRSF10A","O00220","CHEMBL3551","Membrane receptor","0.100578902067"                                   |
| 25     | Disks large homolog 4,"DLG4","P78352","CHEMBL5666","Unclassified protein","0.100578902067"                                |
| 26     | Complement factor B,"CFB","P00751","CHEMBL5731","Protease","0.100578902067"                                               |
| 27     | 11-beta-hydroxysteroid dehydrogenase 1,"HSD11B1","P28845","CHEMBL4235","Enzyme","0.100578902067"                          |
| 28     | Furin,"FURIN","P09958","CHEMBL2611","Protease","0.100578902067"                                                           |
| 29     | Integrin alpha-IIb/beta-3,"ITGA2B ITGB3","P08514 P05106","CHEMBL2093869","Membrane receptor","0.100578902067"             |
| 30     | Prolyl endopeptidase,"PREP","P48147","CHEMBL3202","Protease","0.100578902067"                                             |

|    |                                                                                                                                  |
|----|----------------------------------------------------------------------------------------------------------------------------------|
| 31 | Cathepsin D,"CTSD","P07339","CHEMBL2581","Protease","0.100578902067"                                                             |
| 32 | Aminopeptidase N,"ANPEP","P15144","CHEMBL1907","Protease","0.100578902067"                                                       |
| 33 | Matrix metalloproteinase 2,"MMP2","P08253","CHEMBL333","Protease","0.100578902067"                                               |
| 34 | Xaa-Pro aminopeptidase 1,"XPNPEP1","Q9NQW7","CHEMBL3782","Protease","0.100578902067"                                             |
| 35 | Xaa-Pro aminopeptidase 2,"XPNPEP2","O43895","CHEMBL4610","Protease","0.100578902067"                                             |
| 36 | Leukotriene A4 hydrolase,"LTA4H","P09960","CHEMBL4618","Protease","0.100578902067"                                               |
| 37 | Fibroblast activation protein alpha,"FAP","Q12884","CHEMBL4683","Protease","0.100578902067"                                      |
| 38 | Subtilisin/kexin type 6,"PCSK6","P29122","CHEMBL2951","Protease","0.100578902067"                                                |
| 39 | Hepatocyte growth factor activator,"HGFAC","Q04756","CHEMBL3351190","Unclassified protein","0.100578902067"                      |
| 40 | Histone deacetylase 3,"HDAC3","O15379","CHEMBL1829","Eraser","0.100578902067"                                                    |
| 41 | Histone deacetylase 2,"HDAC2","Q92769","CHEMBL1937","Eraser","0.100578902067"                                                    |
| 42 | Histone deacetylase 4,"HDAC4","P56524","CHEMBL3524","Eraser","0.100578902067"                                                    |
| 43 | Glyoxalase I,"GLO1","Q04760","CHEMBL2424","Enzyme","0.100578902067"                                                              |
| 44 | Plasma kallikrein,"KLKB1","P03952","CHEMBL2000","Protease","0.100578902067"                                                      |
| 45 | Integrin alpha-2/beta-3,"ITGA2 ITGB3","P17301 P05106","CHEMBL2111461","Membrane receptor","0.100578902067"                       |
| 46 | Integrin alpha-V/beta-3,"ITGAV ITGB3","P06756 P05106","CHEMBL1907598","Membrane receptor","0.100578902067"                       |
| 47 | Thrombin,"F2","P00734","CHEMBL204","Protease","0.100578902067"                                                                   |
| 48 | Transcription factor AP1,"FOS JUN","P01100 P05412","CHEMBL2111421","Transcription factor","0.100578902067"                       |
| 49 | Beta-3 adrenergic receptor,"ADRB3","P13945","CHEMBL246","Family A G protein-coupled receptor","0.100578902067"                   |
| 50 | Caspase-1,"CASP1","P29466","CHEMBL4801","Protease","0.100578902067"                                                              |
| 51 | Norepinephrine transporter,"SLC6A2","P23975","CHEMBL222","Electrochemical transporter","0.100578902067"                          |
| 52 | Cathepsin E,"CTSE","P14091","CHEMBL3092","Protease","0.100578902067"                                                             |
| 53 | Pepsin A,"PGA5","P0DJ9","CHEMBL3295","Protease","0.100578902067"                                                                 |
| 54 | ADAM9,"ADAM9","Q13443","CHEMBL5982","Protease","0.100578902067"                                                                  |
| 55 | Cathepsin L,"CTSL","P07711","CHEMBL3837","Protease","0.100578902067"                                                             |
| 56 | Elastase 1,"CELA1","Q9UNI1","CHEMBL3000","Protease","0.100578902067"                                                             |
| 57 | WD repeat-containing protein 5,"WDR5","P61964","CHEMBL1075317","Unclassified protein","0.100578902067"                           |
| 58 | Calpain 1,"CAPN1 CAPNS1","P07384 P04632","CHEMBL2111357","Protease","0.100578902067"                                             |
| 59 | Glycine transporter 1,"SLC6A9","P48067","CHEMBL2337","Electrochemical transporter","0.100578902067"                              |
| 60 | Caspase-3,"CASP3","P42574","CHEMBL2334","Protease","0.100578902067"                                                              |
| 61 | Aminopeptidase A,"ENPEP","Q07075","CHEMBL3439","Protease","0.100578902067"                                                       |
| 62 | HLA class II histocompatibility antigen DRB3-1,"HLA-DRB3","P79483","CHEMBL3460","Surface antigen","0.100578902067"               |
| 63 | Probable G-protein coupled receptor 142,"GPR142","Q7Z601","CHEMBL2069161","Family A G protein-coupled receptor","0.100578902067" |

|    |                                                                                                                                          |
|----|------------------------------------------------------------------------------------------------------------------------------------------|
| 64 | Dipeptidyl peptidase VIII,"DPP8","Q6V1X1","ChEMBL4657","Protease","0.100578902067"                                                       |
| 65 | Dipeptidyl peptidase IX,"DPP9","Q86TI2","ChEMBL4793","Protease","0.100578902067"                                                         |
| 66 | Thyrotropin-releasing hormone receptor (by homology),"TRHR","P34981","ChEMBL1810","Family A G protein-coupled receptor","0.100578902067" |
| 67 | Renin,"REN","P00797","ChEMBL286","Protease","0.100578902067"                                                                             |
| 68 | Epidermal growth factor receptor erbB1,"EGFR","P00533","ChEMBL203","Kinase","0.100578902067"                                             |
| 69 | Casein kinase II alpha,"CSNK2A1","P68400","ChEMBL3629","Kinase","0.100578902067"                                                         |
| 70 | Serine/threonine-protein kinase PIM1,"PIM1","P11309","ChEMBL2147","Kinase","0.100578902067"                                              |
| 71 | Serine/threonine-protein kinase PIM2,"PIM2","Q9P1W9","ChEMBL4523","Kinase","0.100578902067"                                              |
| 72 | Dipeptidyl peptidase II,"DPP7","Q9UHL4","ChEMBL3976","Protease","0.100578902067"                                                         |
| 73 | Tyrosyl-tRNA synthetase,"YARS","P54577","ChEMBL3179","Enzyme","0.100578902067"                                                           |
| 74 | Mu opioid receptor,"OPRM1","P35372","ChEMBL233","Family A G protein-coupled receptor","0.100578902067"                                   |
| 75 | Delta opioid receptor,"OPRD1","P41143","ChEMBL236","Family A G protein-coupled receptor","0.100578902067"                                |
| 76 | Lysine-specific demethylase 4A,"KDM4A","O75164","ChEMBL5896","Eraser","0.100578902067"                                                   |
| 77 | Lysine-specific demethylase 4C,"KDM4C","Q9H3R0","ChEMBL6175","Eraser","0.100578902067"                                                   |
| 78 | Lysine-specific demethylase 5C,"KDM5C","P41229","ChEMBL2163176","Eraser","0.100578902067"                                                |
| 79 | Lysine-specific demethylase 5B,"KDM5B","Q9UGL1","ChEMBL3774295","Eraser","0.100578902067"                                                |
| 80 | Lysine-specific demethylase 2B,"KDM2B","Q8NHM5","ChEMBL3779760","Eraser","0.100578902067"                                                |
| 81 | Histone deacetylase 1,"HDAC1","Q13547","ChEMBL325","Eraser","0.100578902067"                                                             |
| 82 | Histamine H1 receptor,"HRH1","P35367","ChEMBL231","Family A G protein-coupled receptor","0.100578902067"                                 |
| 83 | Caspase-8,"CASP8","Q14790","ChEMBL3776","Protease","0.100578902067"                                                                      |
| 84 | MAP kinase signal-integrating kinase 2,"MKNK2","Q9HBH9","ChEMBL4204","Kinase","0.100578902067"                                           |
| 85 | Leukocyte elastase,"ELANE","P08246","ChEMBL248","Protease","0.100578902067"                                                              |
| 86 | Thrombin and coagulation factor X,"F10","P00742","ChEMBL244","Protease","0.100578902067"                                                 |
| 87 | Lysine-specific demethylase 5A,"KDM5A","P29375","ChEMBL2424504","Eraser","0.100578902067"                                                |
| 88 | Squalene synthetase (by homology),"FDFT1","P37268","ChEMBL3338","Enzyme","0.100578902067"                                                |
| 89 | Trypsin I,"PRSS1","P07477","ChEMBL209","Protease","0.100578902067"                                                                       |
| 90 | Serine/threonine-protein kinase Aurora-A,"AURKA","O14965","ChEMBL4722","Kinase","0.100578902067"                                         |
| 91 | Poly [ADP-ribose] polymerase-1,"PARP1","P09874","ChEMBL3105","Enzyme","0.100578902067"                                                   |
| 92 | Glutathione S-transferase kappa 1,"GSTK1","Q9Y2Q3","ChEMBL4491","Enzyme","0.100578902067"                                                |
| 93 | Glycogen synthase kinase-3 beta,"GSK3B","P49841","ChEMBL262","Kinase","0.100578902067"                                                   |
| 94 | Calcium sensing receptor,"CASR","P41180","ChEMBL1878","Family C G protein-coupled receptor","0.100578902067"                             |
| 95 | GABA transporter 1 (by homology),"SLC6A1","P30531","ChEMBL1903","Electrochemical transporter","0.100578902067"                           |
| 96 | Endoplasmic reticulum aminopeptidase 2,"ERAP2","Q6P179","ChEMBL5043","Protease","0.100578902067"                                         |

|     |                                                                                         |
|-----|-----------------------------------------------------------------------------------------|
| 97  | Carboxypeptidase B,"CPB1","P15086","ChEMBL2552","Protease","0.100578902067"             |
| 98  | AMP deaminase 3,"AMPD3","Q01432","ChEMBL2912","Enzyme","0.100578902067"                 |
| 99  | Ribosomal protein S6 kinase 1,"RPS6KB1","P23443","ChEMBL4501","Kinase","0.100578902067" |
| 100 | Proteasome Macropain subunit,"PSMB2","P49721","ChEMBL3492","Protease","0.100578902067"  |

**Table S3.** Predicted targets for RL peptide. Red font indicates 15 most likely targets.

| Order: | "Target","Common name","Uniprot ID","ChEMBL ID","Target Class","Probability"                                         |
|--------|----------------------------------------------------------------------------------------------------------------------|
| 1      | Neurotensin receptor 2,"NTSR2","O95665","CHEMBL2514","Family A G protein-coupled receptor","0.166097445484"          |
| 2      | Complement factor B,"CFB","P00751","CHEMBL5731","Protease","0.166097445484"                                          |
| 3      | Subtilisin/kexin type 6,"PCSK6","P29122","CHEMBL2951","Protease","0.133337961498"                                    |
| 4      | Hepatocyte growth factor activator,"HGFAC","Q04756","CHEMBL3351190","Unclassified protein"                           |
| 5      | Thrombin and coagulation factor X,"F10","P00742","CHEMBL244","Protease"                                              |
| 6      | WD repeat-containing protein 5,"WDR5","P61964","CHEMBL1075317","Unclassified protein"                                |
| 7      | Furin,"FURIN","P09958","CHEMBL2611","Protease","0.108770969359"                                                      |
| 8      | Neurotensin receptor 1,"NTSR1","P30989","CHEMBL4123","Family A G protein-coupled receptor","0.100578902067"          |
| 9      | Epoxide hydratase (by homology),"EPHX2","P34913","CHEMBL2409","Protease","0.100578902067"                            |
| 10     | Integrin alpha-V/beta-3,"ITGAV ITGB3","P06756 P05106","CHEMBL1907598","Membrane receptor","0.100578902067"           |
| 11     | Neuropilin-1 (by homology),"NRP1","O14786","CHEMBL5174","Secreted protein","0.100578902067"                          |
| 12     | Integrin alpha-IIb/beta-3,"ITGA2B ITGB3","P08514 P05106","CHEMBL2093869","Membrane receptor","0.100578902067"        |
| 13     | Proteinase-activated receptor 2,"F2RL1","P55085","CHEMBL5963","Family A G protein-coupled receptor","0.100578902067" |
| 14     | c-Jun N-terminal kinase 1,"MAPK8","P45983","CHEMBL2276","Kinase","0.100578902067"                                    |
| 15     | Thrombin,"F2","P00734","CHEMBL204","Protease","0.100578902067"                                                       |
| 16     | Integrin alpha-5/beta-1,"ITGB1 ITGA5","P05556 P08648","CHEMBL2095226","Membrane receptor","0.100578902067"           |
| 17     | Transmembrane protease serine 6,"TMPRSS6","Q8IU80","CHEMBL1795139","Protease","0.100578902067"                       |
| 18     | Serine protease hepsin,"HPN","P05981","CHEMBL2079849","Protease","0.100578902067"                                    |
| 19     | Dipeptidyl peptidase IV,"DPP4","P27487","CHEMBL284","Protease","0.100578902067"                                      |
| 20     | Angiotensin-converting enzyme,"ACE","P12821","CHEMBL1808","Protease","0.100578902067"                                |
| 21     | HLA class I histocompatibility antigen A-3,"HLA-A","P04439","CHEMBL2632","Surface antigen","0.100578902067"          |
| 22     | Integrin alpha-V/beta-5,"ITGB5 ITGAV","P18084 P06756","CHEMBL2096675","Membrane receptor","0.100578902067"           |
| 23     | Nitric oxide synthase, inducible,"NOS2","P35228","CHEMBL4481","Enzyme","0.100578902067"                              |
| 24     | Plasminogen,"PLG","P00747","CHEMBL1801","Protease","0.100578902067"                                                  |
| 25     | Cathepsin (H and K),"CTSH","P09668","CHEMBL2225","Protease","0.100578902067"                                         |
| 26     | Cathepsin L,"CTSL","P07711","CHEMBL3837","Protease","0.100578902067"                                                 |
| 27     | Calpain 1,"CAPN1","P07384","CHEMBL3891","Protease","0.100578902067"                                                  |
| 28     | Cathepsin (B and K),"CTSB","P07858","CHEMBL4072","Protease","0.100578902067"                                         |
| 29     | Inhibitor of apoptosis protein 3,"XIAP","P98170","CHEMBL4198","Other cytosolic protein","0.100578902067"             |
| 30     | Menin,"MEN1","O00255","CHEMBL1615381","Unclassified protein","0.100578902067"                                        |

|    |                                                                                                                                         |
|----|-----------------------------------------------------------------------------------------------------------------------------------------|
| 31 | Pepsinogen C (by homology),"PGC","P20142","ChEMBL2136","Protease","0.100578902067"                                                      |
| 32 | Matriptase,"ST14","Q9Y5Y6","ChEMBL3018","Protease","0.100578902067","2 / 3 Å Å Å Å "                                                    |
| 33 | Cyclin-dependent kinase 2/cyclin A,"CDK2 CCNA1 CCNA2","P24941 P78396 P20248","ChEMBL2094128","Other cytosolic protein","0.100578902067" |
| 34 | Tyrosyl-tRNA synthetase,"YARS","P54577","ChEMBL3179","Enzyme","0.100578902067"                                                          |
| 35 | Hydroxycarboxylic acid receptor 2,"HCAR2","Q8TDS4","ChEMBL3785","Family A G protein-coupled receptor","0.100578902067"                  |
| 36 | Carboxypeptidase B2 isoform A,"CPB2","Q96IY4","ChEMBL3419","Protease","0.100578902067"                                                  |
| 37 | Folylpoly-gamma-glutamate synthetase,"FPGS","Q05932","ChEMBL3171","Enzyme","0.100578902067"                                             |
| 38 | Neprilysin,"MME","P08473","ChEMBL1944","Protease","0.100578902067"                                                                      |
| 39 | Cyclin-dependent kinase 4/cyclin D1,"CCND1 CDK4","P24385 P11802","ChEMBL1907601","Kinase","0.100578902067"                              |
| 40 | CDK2/Cyclin A,"CCNA2 CDK2","P20248 P24941","ChEMBL3038469","Kinase","0.100578902067"                                                    |
| 41 | Dipeptidyl peptidase VIII,"DPP8","Q6V1X1","ChEMBL4657","Protease","0.100578902067"                                                      |
| 42 | Muscarinic acetylcholine receptor M4,"CHRM4","P08173","ChEMBL1821","Family A G protein-coupled receptor","0.100578902067"               |
| 43 | Muscarinic acetylcholine receptor M2,"CHRM2","P08172","ChEMBL211","Family A G protein-coupled receptor","0.100578902067"                |
| 44 | Muscarinic acetylcholine receptor M1,"CHRM1","P11229","ChEMBL216","Family A G protein-coupled receptor","0.100578902067"                |
| 45 | Integrin alpha-2/beta-3,"ITGA2 ITGB3","P17301 P05106","ChEMBL2111461","Membrane receptor","0.100578902067"                              |
| 46 | Endoplasmic reticulum aminopeptidase 2,"ERAP2","Q6P179","ChEMBL5043","Protease","0.100578902067"                                        |

**Table S4.** Predicted targets for GF peptide. Red font indicates 15 most likely targets.

| Order: | "Target","Common name","Uniprot ID","ChEMBL ID","Target Class","Probability"                                                       |
|--------|------------------------------------------------------------------------------------------------------------------------------------|
| 1      | Oligopeptide transporter small intestine isoform,"SLC15A1","P46059","CHEMBL4605","Electrochemical transporter","0.129815190994"    |
| 2      | Calpain 1,"CAPN1","P07384","CHEMBL3891","Protease","0.112450964818"                                                                |
| 3      | Neprilysin (by homology),"MME","P08473","CHEMBL1944","Protease","0.103761755413"                                                   |
| 4      | Cyclooxygenase-2,"PTGS2","P35354","CHEMBL230","Oxidoreductase","0.0777583259988"                                                   |
| 5      | Tyrosyl-tRNA synthetase,"YARS","P54577","CHEMBL3179","Enzyme","0.0690974435253"                                                    |
| 6      | Inhibitor of apoptosis protein 3,"XIAP","P98170","CHEMBL4198","Other cytosolic protein","0.0690974435253"                          |
| 7      | HLA class I histocompatibility antigen A-3,"HLA-A","P04439","CHEMBL2632","Surface antigen","0.0604245879294"                       |
| 8      | Angiotensin-converting enzyme,"ACE","P12821","CHEMBL1808","Protease","0.0604245879294"                                             |
| 9      | Solute carrier family 22 member 6 (by homology),"SLC22A6","Q4U2R8","CHEMBL1641347","Electrochemical transporter","0.0604245879294" |
| 10     | Cholecystokinin B receptor,"CCKBR","P32239","CHEMBL298","Family A G protein-coupled receptor","0.0604245879294"                    |
| 11     | Neurokinin 1 receptor,"TACR1","P25103","CHEMBL249","Family A G protein-coupled receptor","0.0604245879294"                         |
| 12     | Carboxypeptidase A1,"CPA1","P15085","CHEMBL2088","Protease","0.0604245879294"                                                      |
| 13     | Angiotensin-converting enzyme 2,"ACE2","Q9BYF1","CHEMBL3736","Protease","0.0604245879294"                                          |
| 14     | Carboxypeptidase B,"CPB1","P15086","CHEMBL2552","Protease","0.0604245879294"                                                       |
| 15     | Proenkephalin B,"PDYN","P01213","CHEMBL2227","Other ion channel","0.0604245879294"                                                 |
| 16     | Formyl peptide receptor 1,"FPR1","P21462","CHEMBL3359","Family A G protein-coupled receptor","0.0604245879294"                     |
| 17     | Lysine-specific demethylase 4C,"KDM4C","Q9H3R0","CHEMBL6175","Eraser","0.0604245879294"                                            |
| 18     | Ephrin type-A receptor 2,"EPHA2","P29317","CHEMBL2068","Kinase","0.0604245879294"                                                  |
| 19     | Cathepsin K,"CTSK","P43235","CHEMBL268","Protease","0.0604245879294"                                                               |
| 20     | Cathepsin (B and K),"CTSB","P07858","CHEMBL4072","Protease","0.0604245879294"                                                      |
| 21     | Chromobox protein homolog 7,"CBX7","O95931","CHEMBL1764946","Reader","0.0604245879294"                                             |
| 22     | E3 SUMO-protein ligase CBX4,"CBX4","O00257","CHEMBL3232685","Enzyme","0.0604245879294"                                             |
| 23     | Serotonin 2b (5-HT2b) receptor,"HTR2B","P41595","CHEMBL1833","Family A G protein-coupled receptor","0.0604245879294"               |
| 24     | Nitric oxide synthase, inducible,"NOS2","P35228","CHEMBL4481","Enzyme","0.0604245879294"                                           |
| 25     | Aminopeptidase N,"ANPEP","P15144","CHEMBL1907","Protease","0.0604245879294"                                                        |
| 26     | Glutamate receptor ionotropic, AMPA 1,"GRIA1","P42261","CHEMBL2009","Ligand-gated ion channel","0.0604245879294"                   |
| 27     | Dipeptidyl peptidase I,"CTSC","P53634","CHEMBL2252","Protease","0.0604245879294"                                                   |
| 28     | Epoxide hydratase,"EPHX2","P34913","CHEMBL2409","Protease","0.0604245879294"                                                       |
| 29     | Kynureninase,"KYNU","Q16719","CHEMBL5100","Enzyme","0.0604245879294"                                                               |

|    |                                                                                                                                                                              |
|----|------------------------------------------------------------------------------------------------------------------------------------------------------------------------------|
| 30 | Voltage-gated calcium channel alpha2/delta subunit 1 (by homology),"CACNA2D1","P54289","ChEMBL1919","Calcium channel auxiliary subunit alpha2delta family","0.0604245879294" |
| 31 | Nitric-oxide synthase, endothelial,"NOS3","P29474","ChEMBL4803","Enzyme","0.0604245879294"                                                                                   |
| 32 | Cathepsin L,"CTSL","P07711","ChEMBL3837","Protease","0.0604245879294",                                                                                                       |
| 33 | Cyclin-dependent kinase 4/cyclin D1,"CCND1 CDK4","P24385 P11802","ChEMBL1907601","Kinase","0.0604245879294"                                                                  |
| 34 | CDK2/Cyclin A,"CCNA2 CDK2","P20248 P24941","ChEMBL3038469","Kinase","0.0604245879294"                                                                                        |
| 35 | Intercellular adhesion molecule (ICAM-1), Integrin alpha-L/beta-2,"ITGAL ICAM1 ITGB2","P20701 P05362 P05107","ChEMBL2096661","Membrane receptor","0.0604245879294"           |
| 36 | Leukotriene A4 hydrolase,"LTA4H","P09960","ChEMBL4618","Protease","0.0604245879294"                                                                                          |
| 37 | MAP kinase-activated protein kinase 2,"MAPKAPK2","P49137","ChEMBL2208","Kinase","0.0604245879294"                                                                            |
| 38 | Mu opioid receptor (by homology),"OPRM1","P35372","ChEMBL233","Family A G protein-coupled receptor","0.0604245879294"                                                        |
| 39 | MAP kinase ERK2,"MAPK1","P28482","ChEMBL4040","Kinase","0.0604245879294"                                                                                                     |
| 40 | Neurotensin receptor 1 (by homology),"NTSR1","P30989","ChEMBL4123","Family A G protein-coupled receptor","0.0604245879294"                                                   |
| 41 | Caspase-1,"CASP1","P29466","ChEMBL4801","Protease","0.0604245879294"                                                                                                         |
| 42 | GABA-B receptor (by homology),"GABBR1","Q9UBS5","ChEMBL2064","Family C G protein-coupled receptor","0.0604245879294"                                                         |
| 43 | Neurotensin receptor 2,"NTSR2","O95665","ChEMBL2514","Family A G protein-coupled receptor","0.0604245879294"                                                                 |
| 44 | Integrin alpha-4/beta-1,"ITGB1 ITGA4","P05556 P13612","ChEMBL1907599","Membrane receptor","0.0604245879294"                                                                  |
| 45 | Cyclin-dependent kinase 2/cyclin A,"CDK2 CCNA1 CCNA2","P24941 P78396 P20248","ChEMBL2094128","Other cytosolic protein","0.0604245879294"                                     |
| 46 | C-C chemokine receptor type 3,"CCR3","P51677","ChEMBL3473","Family A G protein-coupled receptor","0.0604245879294"                                                           |
| 47 | Sigma opioid receptor,"SIGMAR1","Q99720","ChEMBL287","Membrane receptor","0.0604245879294"                                                                                   |
| 48 | Delta opioid receptor (by homology),"OPRD1","P41143","ChEMBL236","Family A G protein-coupled receptor","0.0604245879294"                                                     |
| 49 | HLA class II histocompatibility antigen DRB1-1,"HLA-DRB1","P04229","ChEMBL1943","Surface antigen","0.0604245879294"                                                          |
| 50 | Ribonucleoside-diphosphate reductase M1 chain (by homology),"RRM1","P23921","ChEMBL1830","Oxidoreductase","0.0604245879294"                                                  |
| 51 | Gamma-secretase,"PSENEN","Q9NZ42","ChEMBL2374","Enzyme","0.0604245879294"                                                                                                    |
| 52 | Peptidyl-glycine alpha-amidating monooxygenase,"PAM","P19021","ChEMBL2544","Enzyme","0.0604245879294"                                                                        |
| 53 | Dipeptidyl peptidase IV,"DPP4","P27487","ChEMBL284","Protease","0.0604245879294"                                                                                             |
| 54 | Serine/threonine-protein kinase PIM1,"PIM1","P11309","ChEMBL2147","Kinase","0.0604245879294"                                                                                 |
| 55 | Serine/threonine-protein kinase PIM2,"PIM2","Q9P1W9","ChEMBL4523","Kinase","0.0604245879294"                                                                                 |
| 56 | Glutamate receptor ionotropic, AMPA 2,"GRIA2","P42262","ChEMBL4016","Ligand-gated ion channel","0.0604245879294"                                                             |
| 57 | Neurokinin 2 receptor,"TACR2","P21452","ChEMBL2327","Family A G protein-coupled receptor","0.0604245879294"                                                                  |
| 58 | Acyl-CoA:dihydroxyacetonephosphateacyltransferase,"GNPAT","O15228","ChEMBL4494","Enzyme","0.0604245879294"                                                                   |
| 59 | Lysine-specific demethylase 5C,"KDM5C","P41229","ChEMBL2163176","Eraser","0.0604245879294"                                                                                   |
| 60 | Lysine-specific demethylase 4B,"KDM4B","O94953","ChEMBL3313832","Eraser","0.0604245879294"                                                                                   |

|    |                                                                                                                                      |
|----|--------------------------------------------------------------------------------------------------------------------------------------|
| 61 | Lysine-specific demethylase 5B,"KDM5B","Q9UGL1","ChEMBL3774295","Eraser","0.0604245879294"                                           |
| 62 | Lysine-specific demethylase 4A,"KDM4A","O75164","ChEMBL5896","Eraser","0.0604245879294"                                              |
| 63 | Metabotropic glutamate receptor 6 (by homology),"GRM6","O15303","ChEMBL4573","Family C G protein-coupled receptor","0.0604245879294" |
| 64 | Metabotropic glutamate receptor 2,"GRM2","Q14416","ChEMBL5137","Family C G protein-coupled receptor","0.0604245879294"               |
| 65 | Galanin receptor 1 (by homology),"GALR1","P47211","ChEMBL4894","Family A G protein-coupled receptor","0.0604245879294"               |
| 66 | Galanin receptor 2 (by homology),"GALR2","O43603","ChEMBL3176","Family A G protein-coupled receptor","0.0604245879294"               |

**Table S5.** Predicted targets for SF peptide. Red font indicates 15 most likely targets.

| Order: | "Target","Common name","Uniprot ID","ChEMBL ID","Target Class","Probability"                                                           |
|--------|----------------------------------------------------------------------------------------------------------------------------------------|
| 1      | Calpain 1,"CAPN1","P07384","CHEMBL3891","Protease","0.0807923867549"                                                                   |
| 2      | Oligopeptide transporter small intestine isoform,"SLC15A1","P46059","CHEMBL4605","Electrochemical transporter","0.071715932485"        |
| 3      | Cyclooxygenase-2,"PTGS2","P35354","CHEMBL230","Oxidoreductase","0.0626219668353"                                                       |
| 4      | Angiotensin-converting enzyme,"ACE","P12821","CHEMBL1808","Protease","0.0626219668353"                                                 |
| 5      | Neprilysin,"MME","P08473","CHEMBL1944","Protease","0.0626219668353"                                                                    |
| 6      | Tyrosyl-tRNA synthetase,"YARS","P54577","CHEMBL3179","Enzyme","0.0626219668353"                                                        |
| 7      | Inhibitor of apoptosis protein 3,"XIAP","P98170","CHEMBL4198","Other cytosolic protein","0.0535560755162"                              |
| 8      | HLA class I histocompatibility antigen A-3,"HLA-A","P04439","CHEMBL2632","Surface antigen","0.0535560755162"                           |
| 9      | Mu opioid receptor (by homology),"OPRM1","P35372","CHEMBL233","Family A G protein-coupled receptor","0.0535560755162"                  |
| 10     | Solute carrier family 22 member 6 (by homology),"SLC22A6","Q4U2R8","CHEMBL1641347","Electrochemical transporter","0.0535560755162"     |
| 11     | Chromobox protein homolog 7,"CBX7","O95931","CHEMBL1764946","Reader","0.0535560755162"                                                 |
| 12     | E3 SUMO-protein ligase CBX4,"CBX4","O00257","CHEMBL3232685","Enzyme","0.0535560755162"                                                 |
| 13     | Ribonucleoside-diphosphate reductase M1 chain (by homology),"RRM1","P23921","CHEMBL1830","Oxidoreductase","0.0535560755162"            |
| 14     | Neurokinin 2 receptor,"TACR2","P21452","CHEMBL2327","Family A G protein-coupled receptor","0.0535560755162"                            |
| 15     | Proenkephalin B,"PDYN","P01213","CHEMBL2227","Other ion channel","0.0535560755162"                                                     |
| 16     | Beta-secretase 1,"BACE1","P56817","CHEMBL4822","Protease","0.0535560755162"                                                            |
| 17     | Formyl peptide receptor 1,"FPR1","P21462","CHEMBL3359","Family A G protein-coupled receptor","0.0535560755162"                         |
| 18     | Calcitonin gene-related peptide type 1 receptor,"CALCRL","Q16602","CHEMBL3798","Family B G protein-coupled receptor","0.0535560755162" |
| 19     | Ephrin type-A receptor 2,"EPHA2","P29317","CHEMBL2068","Kinase","0.0535560755162"                                                      |
| 20     | Cholecystokinin B receptor,"CCKBR","P32239","CHEMBL298","Family A G protein-coupled receptor","0.0535560755162"                        |
| 21     | Neurokinin 1 receptor (by homology),"TACR1","P25103","CHEMBL249","Family A G protein-coupled receptor","0.0535560755162"               |
| 22     | Bradykinin B1 receptor,"BDKRB1","P46663","CHEMBL4308","Family A G protein-coupled receptor","0.0535560755162"                          |
| 23     | Neuropeptide FF receptor 1,"NPFFR1","Q9GZQ6","CHEMBL5951","Family A G protein-coupled receptor","0.0535560755162"                      |
| 24     | Neuropeptide FF receptor 2,"NPFFR2","Q9Y5X5","CHEMBL5952","Family A G protein-coupled receptor","0.0535560755162"                      |
| 25     | Delta opioid receptor (by homology),"OPRD1","P41143","CHEMBL236","Family A G protein-coupled receptor","0.0535560755162"               |
| 26     | Endothelin receptor ET-A,"EDNRA","P25101","CHEMBL252","Family A G protein-coupled receptor","0.0535560755162"                          |
| 27     | Carboxypeptidase A1,"CPA1","P15085","CHEMBL2088","Protease","0.0535560755162"                                                          |
| 28     | Epoxide hydratase,"EPHX2","P34913","CHEMBL2409","Protease","0.0535560755162"                                                           |
| 29     | Galanin receptor 1 (by homology),"GALR1","P47211","CHEMBL4894","Family A G protein-coupled receptor","0.0535560755162"                 |
| 30     | Galanin receptor 2 (by homology),"GALR2","O43603","CHEMBL3176","Family A G protein-coupled receptor","0.0535560755162"                 |

|    |                                                                                                                                          |
|----|------------------------------------------------------------------------------------------------------------------------------------------|
| 31 | Cathepsin D,"CTSD","P07339","ChEMBL2581","Protease","0.0535560755162"                                                                    |
| 32 | Cathepsin E,"CTSE","P14091","ChEMBL3092","Protease","0.0535560755162"                                                                    |
| 33 | Carboxypeptidase B,"CPB1","P15086","ChEMBL2552","Protease","0.0535560755162"                                                             |
| 34 | Sphingosine kinase 1,"SPHK1","Q9NYA1","ChEMBL4394","Enzyme","0.0535560755162"                                                            |
| 35 | Lysine-specific demethylase 4C,"KDM4C","Q9H3R0","ChEMBL6175","Eraser","0.0535560755162"                                                  |
| 36 | Cyclin-dependent kinase 4/cyclin D1,"CCND1 CDK4","P24385 P11802","ChEMBL1907601","Kinase","0.0535560755162"                              |
| 37 | CDK2/Cyclin A,"CCNA2 CDK2","P20248 P24941","ChEMBL3038469","Kinase","0.0535560755162"                                                    |
| 38 | MAP kinase ERK2,"MAPK1","P28482","ChEMBL4040","Kinase","0.0535560755162"                                                                 |
| 39 | Neurotensin receptor 1 (by homology),"NTSR1","P30989","ChEMBL4123","Family A G protein-coupled receptor","0.0535560755162"               |
| 40 | Glucosamine--fructose-6-phosphate aminotransferase [isomerizing] 1,"GFPT1","Q06210","ChEMBL1909481","Enzyme","0.0535560755162"           |
| 41 | Signal transducer and activator of transcription 3,"STAT3","P40763","ChEMBL4026","Transcription factor","0.0535560755162"                |
| 42 | Cathepsin (B and K),"CTSB","P07858","ChEMBL4072","Protease","0.0535560755162"                                                            |
| 43 | Ghrelin receptor,"GHSR","Q92847","ChEMBL4616","Family A G protein-coupled receptor","0.0535560755162"                                    |
| 44 | Serine/threonine-protein kinase/endoribonuclease IRE1,"ERN1","O75460","ChEMBL1163101","Enzyme","0.0535560755162"                         |
| 45 | Pyroglutamylated RFamide peptide receptor,"QRFPR","Q96P65","ChEMBL5852","Family A G protein-coupled receptor","0.0535560755162"          |
| 46 | Beta secretase 2,"BACE2","Q9Y5Z0","ChEMBL2525","Protease","0.0535560755162"                                                              |
| 47 | Nitric oxide synthase, inducible,"NOS2","P35228","ChEMBL4481","Enzyme","0.0535560755162"                                                 |
| 48 | Interleukin-1 beta,"IL1B","P01584","ChEMBL1909490","Secreted protein","0.0535560755162"                                                  |
| 49 | Cyclin-dependent kinase 2/cyclin A,"CDK2 CCNA1 CCNA2","P24941 P78396 P20248","ChEMBL2094128","Other cytosolic protein","0.0535560755162" |
| 50 | C-C chemokine receptor type 3,"CCR3","P51677","ChEMBL3473","Family A G protein-coupled receptor","0.0535560755162"                       |
| 51 | Kappa Opioid receptor,"OPRK1","P41145","ChEMBL237","Family A G protein-coupled receptor","0.0535560755162"                               |
| 52 | Neurotensin receptor 2,"NTSR2","O95665","ChEMBL2514","Family A G protein-coupled receptor","0.0535560755162"                             |
| 53 | Cathepsin L,"CTSL","P07711","ChEMBL3837","Protease","0.0535560755162"                                                                    |
| 54 | Integrin alpha-V/beta-3,"ITGAV ITGB3","P06756 P05106","ChEMBL1907598","Membrane receptor","0.0535560755162"                              |
| 55 | Gamma-secretase,"PSENEN","Q9NZ42","ChEMBL2374","Enzyme","0.0535560755162"                                                                |
| 56 | Vasopressin V1a receptor,"AVPR1A","P37288","ChEMBL1889","Family A G protein-coupled receptor","0.0535560755162"                          |
| 57 | Nitric-oxide synthase, endothelial,"NOS3","P29474","ChEMBL4803","Enzyme","0.0535560755162"                                               |
| 58 | Kynureninase,"KYNU","Q16719","ChEMBL5100","Enzyme","0.0535560755162"                                                                     |
| 59 | C-X-C chemokine receptor type 7,"ACKR3","P25106","ChEMBL2010631","Family A G protein-coupled receptor","0.0535560755162"                 |
| 60 | C3a anaphylatoxin chemotactic receptor,"C3AR1","Q16581","ChEMBL4761","Family A G protein-coupled receptor","0.0535560755162"             |
| 61 | Glutamate receptor ionotropic kainate 2,"GRIK2","Q13002","ChEMBL3683","Ligand-gated ion channel","0.0535560755162"                       |
| 62 | Glutamate receptor ionotropic kainate 3,"GRIK3","Q13003","ChEMBL3684","Ligand-gated ion channel","0.0535560755162"                       |
| 63 | Protein farnesyltransferase,"FNTA FNTB","P49354 P49356","ChEMBL2094108","Enzyme","0.0535560755162"                                       |

|    |                                                                                                                                      |
|----|--------------------------------------------------------------------------------------------------------------------------------------|
| 64 | Cathepsin K,"CTSK","P43235","ChEMBL268","Protease","0.0535560755162"                                                                 |
| 65 | Kynurenine 3-monooxygenase (by homology),"KMO","O15229","ChEMBL2145","Oxidoreductase","0.0535560755162"                              |
| 66 | MAP kinase-activated protein kinase 2,"MAPKAPK2","P49137","ChEMBL2208","Kinase","0.0535560755162"                                    |
| 67 | Geranylgeranyl transferase type I,"PGGT1B FNTA","P53609 P49354","ChEMBL2095164","Enzyme","0.0535560755162"                           |
| 68 | Renin,"REN","P00797","ChEMBL286","Protease","0.0535560755162"                                                                        |
| 69 | Metabotropic glutamate receptor 2 (by homology),"GRM2","Q14416","ChEMBL5137","Family C G protein-coupled receptor","0.0535560755162" |

**Table S6.** Predicted targets for TF peptide. Red font indicates 15 most likely targets.

| Order: | "Target","Common name","Uniprot ID","ChEMBL ID","Target Class","Probability"                                                          |
|--------|---------------------------------------------------------------------------------------------------------------------------------------|
| 1      | Calpain 1,"CAPN1","P07384","CHEMBL3891","Protease","0.237759864997"                                                                   |
| 2      | Tyrosyl-tRNA synthetase,"YARS","P54577","CHEMBL3179","Enzyme","0.143473412261"                                                        |
| 3      | Cyclooxygenase-2,"PTGS2","P35354","CHEMBL230","Oxidoreductase","0.143473412261"                                                       |
| 4      | Neprilysin (by homology),"MME","P08473","CHEMBL1944","Protease","0.135616202575"                                                      |
| 5      | Oligopeptide transporter small intestine isoform,"SLC15A1","P46059","CHEMBL4605","Electrochemical transporter","0.135616202575"       |
| 6      | Angiotensin-converting enzyme,"ACE","P12821","CHEMBL1808","Protease","0.127750341333"                                                 |
| 7      | Mu opioid receptor (by homology),"OPRM1","P35372","CHEMBL233","Family A G protein-coupled receptor","0.119895126898"                  |
| 8      | HLA class I histocompatibility antigen A-3,"HLA-A","P04439","CHEMBL2632","Surface antigen","0.119895126898"                           |
| 9      | Solute carrier family 22 member 6 (by homology),"SLC22A6","Q4U2R8","CHEMBL1641347","Electrochemical transporter","0.112041901328"     |
| 10     | Delta opioid receptor (by homology),"OPRD1","P41143","CHEMBL236","Family A G protein-coupled receptor","0.112041901328"               |
| 11     | Chromobox protein homolog 7,"CBX7","O95931","CHEMBL1764946","Reader","0.112041901328"                                                 |
| 12     | E3 SUMO-protein ligase CBX4,"CBX4","O00257","CHEMBL3232685","Enzyme","0.112041901328"                                                 |
| 13     | Ribonucleoside-diphosphate reductase M1 chain (by homology),"RRM1","P23921","CHEMBL1830","Oxidoreductase","0.112041901328"            |
| 14     | Neurokinin 2 receptor,"TACR2","P21452","CHEMBL2327","Family A G protein-coupled receptor","0.112041901328"                            |
| 15     | Proenkephalin B,"PDYN","P01213","CHEMBL2227","Other ion channel","0.112041901328"                                                     |
| 16     | Protein farnesyltransferase,"FNTA FNTB","P49354 P49356","CHEMBL2094108","Enzyme","0.112041901328"                                     |
| 17     | Formyl peptide receptor 1,"FPR1","P21462","CHEMBL3359","Family A G protein-coupled receptor","0.112041901328"                         |
| 18     | Ephrin type-A receptor 2,"EPHA2","P29317","CHEMBL2068","Kinase","0.112041901328"                                                      |
| 19     | Calcitonin gene-related peptide type 1 receptor,"CALCRL","Q16602","CHEMBL3798","Family B G protein-coupled receptor","0.112041901328" |
| 20     | Cholecystokinin B receptor,"CCKBR","P32239","CHEMBL298","Family A G protein-coupled receptor","0.112041901328"                        |
| 21     | Neurokinin 1 receptor,"TACR1","P25103","CHEMBL249","Family A G protein-coupled receptor","0.112041901328"                             |
| 22     | Renin,"REN","P00797","CHEMBL286","Protease","0.112041901328"                                                                          |
| 23     | Bradykinin B1 receptor,"BDKRB1","P46663","CHEMBL4308","Family A G protein-coupled receptor","0.112041901328"                          |
| 24     | Kappa Opioid receptor,"OPRK1","P41145","CHEMBL237","Family A G protein-coupled receptor","0.112041901328"                             |
| 25     | Carboxypeptidase A1,"CPA1","P15085","CHEMBL2088","Protease","0.112041901328"                                                          |
| 26     | Neuropeptide FF receptor 1,"NPFFR1","Q9GZQ6","CHEMBL5951","Family A G protein-coupled receptor","0.112041901328"                      |
| 27     | Neuropeptide FF receptor 2,"NPFFR2","Q9Y5X5","CHEMBL5952","Family A G protein-coupled receptor","0.112041901328"                      |
| 28     | Galanin receptor 1 (by homology),"GALR1","P47211","CHEMBL4894","Family A G protein-coupled receptor","0.112041901328"                 |
| 29     | Galanin receptor 2 (by homology),"GALR2","O43603","CHEMBL3176","Family A G protein-coupled receptor","0.112041901328"                 |
| 30     | Epoxide hydratase,"EPHX2","P34913","CHEMBL2409","Protease","0.112041901328"                                                           |

|    |                                                                                                                                                |
|----|------------------------------------------------------------------------------------------------------------------------------------------------|
| 31 | Integrin alpha-V/beta-3,"ITGAV ITGB3","P06756 P05106","CHEMBL1907598","Membrane receptor","0.112041901328"                                     |
| 32 | Carboxypeptidase B,"CPB1","P15086","CHEMBL2552","Protease","0.112041901328"                                                                    |
| 33 | Nitric oxide synthase, inducible,"NOS2","P35228","CHEMBL4481","Enzyme","0.112041901328"                                                        |
| 34 | Sphingosine kinase 1,"SPHK1","Q9NYA1","CHEMBL4394","Enzyme","0.112041901328"                                                                   |
| 35 | Cathepsin D,"CTSD","P07339","CHEMBL2581","Protease","0.112041901328"                                                                           |
| 36 | Cathepsin E,"CTSE","P14091","CHEMBL3092","Protease","0.112041901328"                                                                           |
| 37 | Inhibitor of apoptosis protein 3,"XIAP","P98170","CHEMBL4198","Other cytosolic protein","0.112041901328"                                       |
| 38 | Cathepsin (B and K),"CTSB","P07858","CHEMBL4072","Protease","0.112041901328"                                                                   |
| 39 | Cyclin-dependent kinase 4/cyclin D1,"CCND1 CDK4","P24385 P11802","CHEMBL1907601","Kinase","0.112041901328"                                     |
| 40 | CDK2/Cyclin A,"CCNA2 CDK2","P20248 P24941","CHEMBL3038469","Kinase","0.112041901328"                                                           |
| 41 | Neurotensin receptor 1 (by homology),"NTSR1","P30989","CHEMBL4123","Family A G protein-coupled receptor","0.112041901328"                      |
| 42 | Endothelin-converting enzyme 1,"ECE1","P42892","CHEMBL4791","Protease","0.112041901328"                                                        |
| 43 | Signal transducer and activator of transcription 3,"STAT3","P40763","CHEMBL4026","Transcription factor","0.112041901328"                       |
| 44 | Leukotriene A4 hydrolase,"LTA4H","P09960","CHEMBL4618","Protease","0.112041901328"                                                             |
| 45 | Caspase-1,"CASP1","P29466","CHEMBL4801","Protease","0.112041901328"                                                                            |
| 46 | Aminopeptidase N,"ANPEP","P15144","CHEMBL1907","Protease","0.112041901328"                                                                     |
| 47 | Dipeptidyl peptidase IV,"DPP4","P27487","CHEMBL284","Protease","0.112041901328"                                                                |
| 48 | Pyroglutamylated RFamide peptide receptor,"QRFPR","Q96P65","CHEMBL5852","Family A G protein-coupled receptor","0.112041901328"                 |
| 49 | HMG-CoA reductase,"HMGCR","P04035","CHEMBL402","Oxidoreductase","0.112041901328"                                                               |
| 50 | Beta secretase 2,"BACE2","Q9Y5Z0","CHEMBL2525","Protease","0.112041901328"                                                                     |
| 51 | Interleukin-1 beta,"IL1B","P01584","CHEMBL1909490","Secreted protein","0.112041901328"                                                         |
| 52 | Cathepsin L,"CTSL","P07711","CHEMBL3837","Protease","0.112041901328"                                                                           |
| 53 | Cyclin-dependent kinase 2/cyclin A,"CDK2 CCNA1 CCNA2","P24941 P78396 P20248","CHEMBL2094128","Other cytosolic protein","0.112041901328"        |
| 54 | Disks large homolog 4,"DLG4","P78352","CHEMBL5666","Unclassified protein","0.112041901328"                                                     |
| 55 | Dopamine transporter (by homology),"SLC6A3","Q01959","CHEMBL238","Electrochemical transporter","0.112041901328"                                |
| 56 | Neurotensin receptor 2,"NTSR2","O95665","CHEMBL2514","Family A G protein-coupled receptor","0.112041901328"                                    |
| 57 | Vasopressin V1a receptor,"AVPR1A","P37288","CHEMBL1889","Family A G protein-coupled receptor","0.112041901328"                                 |
| 58 | MAP kinase-activated protein kinase 2,"MAPKAPK2","P49137","CHEMBL2208","Kinase","0.112041901328"                                               |
| 59 | Leucine aminopeptidase,"LAP3","P28838","CHEMBL3965","Protease","0.112041901328"                                                                |
| 60 | Cathepsin K,"CTSK","P43235","CHEMBL268","Protease","0.112041901328"                                                                            |
| 61 | C-X-C chemokine receptor type 7,"ACKR3","P25106","CHEMBL2010631","Family A G protein-coupled receptor","0.112041901328"                        |
| 62 | Dipeptidyl peptidase I,"CTSC","P53634","CHEMBL2252","Protease","0.112041901328","0 / 207Â Â Â Â Â "                                            |
| 63 | C3a anaphylatoxin chemotactic receptor,"C3AR1","Q16581","CHEMBL4761","Family A G protein-coupled receptor","0.112041901328","0 / 11Â Â Â Â Â " |

|    |                                                                                                                                                |
|----|------------------------------------------------------------------------------------------------------------------------------------------------|
| 64 | Max-like protein X,"MLX","Q9UH92","ChEMBL2062357","Unclassified protein","0.112041901328"                                                      |
| 65 | HLA class II histocompatibility antigen DRB1-1,"HLA-DRB1","P04229","ChEMBL1943","Surface antigen","0.112041901328"                             |
| 66 | Nitric-oxide synthase, endothelial,"NOS3","P29474","ChEMBL4803","Enzyme","0.112041901328"                                                      |
| 67 | Serine/threonine-protein kinase/endoribonuclease IRE1,"ERN1","O75460","ChEMBL1163101","Enzyme","0.112041901328"                                |
| 68 | Lysine-specific histone demethylase 1,"KDM1A","O60341","ChEMBL6136","Eraser","0.112041901328"                                                  |
| 69 | Beta-secretase 1,"BACE1","P56817","ChEMBL4822","Protease","0.112041901328"                                                                     |
| 70 | Endothelin receptor ET-A,"EDNRA","P25101","ChEMBL252","Family A G protein-coupled receptor","0.112041901328"                                   |
| 71 | Matrix metalloproteinase 3,"MMP3","P08254","ChEMBL283","Protease","0.112041901328"                                                             |
| 72 | Atrial natriuretic factor,"NPPA","P01160","ChEMBL1293193","Unclassified protein","0.112041901328"                                              |
| 73 | Gamma-secretase,"PSEN2 PSENEN NCSTN APO1A PSEN1 APO1B","P49810 Q9NZ42 Q92542 Q96BI3 P49768 Q8WW43","ChEMBL2094135","Protease","0.112041901328" |
| 74 | Serine/threonine-protein kinase PIM1,"PIM1","P11309","ChEMBL2147","Kinase","0.112041901328"                                                    |
| 75 | Serine/threonine-protein kinase PIM2,"PIM2","Q9P1W9","ChEMBL4523","Kinase","0.112041901328"                                                    |
| 76 | Protein arginine N-methyltransferase 5,"PRMT5","O14744","ChEMBL1795116","Writer","0.112041901328"                                              |
| 77 | Histone-lysine N-methyltransferase, H3 lysine-79 specific,"DOT1L","Q8TEK3","ChEMBL1795117","Writer","0.112041901328"                           |
| 78 | DNA (cytosine-5)-methyltransferase 1,"DNMT1","P26358","ChEMBL1993","Writer","0.112041901328"                                                   |
| 79 | Nicotinamide N-methyltransferase,"NNMT","P40261","ChEMBL2346486","Enzyme","0.112041901328"                                                     |
| 80 | Protein arginine N-methyltransferase 3,"PRMT3","O60678","ChEMBL5891","Writer","0.112041901328"                                                 |
| 81 | Peptidyl-prolyl cis-trans isomerase NIMA-interacting 1,"PIN1","Q13526","ChEMBL2288","Enzyme","0.112041901328"                                  |
| 82 | Aminopeptidase B (by homology),"RNPEP","Q9H4A4","ChEMBL2432","Protease","0.112041901328"                                                       |
| 83 | Matrix metalloproteinase 2,"MMP2","P08253","ChEMBL333","Protease","0.112041901328"                                                             |
| 84 | Histone-lysine N-methyltransferase MLL,"KMT2A","Q03164","ChEMBL1293299","Writer","0.112041901328"                                              |
| 85 | Histone-lysine N-methyltransferase SUV39H1,"SUV39H1","O43463","ChEMBL1795118","Writer","0.112041901328"                                        |
| 86 | Indolethylamine N-methyltransferase,"INMT","O95050","ChEMBL2131","Enzyme","0.112041901328"                                                     |
| 87 | EZH2/SUZ12/EED/RBBP7/RBBP4,"EZH2","Q15910","ChEMBL2189110","Writer","0.112041901328"                                                           |
| 88 | Histone-lysine N-methyltransferase EZH1,"EZH1","Q92800","ChEMBL2189116","Writer","0.112041901328"                                              |
| 89 | Histone-lysine N-methyltransferase SETDB1,"SETDB1","Q15047","ChEMBL2321646","Writer","0.112041901328"                                          |
| 90 | Histone-arginine methyltransferase CARM1,"CARM1","Q86X55","ChEMBL5406","Writer","0.112041901328"                                               |
| 91 | Protein-arginine N-methyltransferase 1,"PRMT1","Q99873","ChEMBL5524","Writer","0.112041901328"                                                 |
| 92 | Histone-lysine N-methyltransferase, H3 lysine-9 specific 5,"EHMT1","Q9H9B1","ChEMBL6031","Writer","0.112041901328"                             |
| 93 | Histone-lysine N-methyltransferase, H3 lysine-9 specific 3,"EHMT2","Q96KQ7","ChEMBL6032","Writer","0.112041901328"                             |
| 94 | DNA (cytosine-5)-methyltransferase 3B,"DNMT3B","Q9UBC3","ChEMBL6095","Reader","0.112041901328"                                                 |
| 95 | Protein-tyrosine phosphatase 1C,"PTPN6","P29350","ChEMBL3166","Phosphatase","0.112041901328"                                                   |

|     |                                                                                                                                     |
|-----|-------------------------------------------------------------------------------------------------------------------------------------|
| 96  | N-acylsphingosine-amidohydrolase (by homology),"NAAA","Q02083","ChEMBL4349","Enzyme","0.112041901328"                               |
| 97  | Sigma opioid receptor,"SIGMAR1","Q99720","ChEMBL287","Membrane receptor","0.112041901328"                                           |
| 98  | Thrombin,"F2","P00734","ChEMBL204","Protease","0.112041901328"                                                                      |
| 99  | Metabotropic glutamate receptor 2 (by homology),"GRM2","Q14416","ChEMBL5137","Family C G protein-coupled receptor","0.112041901328" |
| 100 | Cathepsin S,"CTSS","P25774","ChEMBL2954","Protease","0.112041901328"                                                                |

**Table S7.** Predicted targets for QF peptide. Red font indicates 15 most likely targets.

| Order: | "Target","Common name","Uniprot ID","ChEMBL ID","Target Class","Probability"                                                      |
|--------|-----------------------------------------------------------------------------------------------------------------------------------|
| 1      | Angiotensin-converting enzyme,"ACE","P12821","ChEMBL1808","Protease","0.237885167579"                                             |
| 2      | Calpain 1,"CAPN1","P07384","ChEMBL3891","Protease","0.229685699326"                                                               |
| 3      | Tyrosyl-tRNA synthetase,"YARS","P54577","ChEMBL3179","Enzyme","0.139061946948"                                                    |
| 4      | Cyclooxygenase-2,"PTGS2","P35354","ChEMBL230","Oxidoreductase","0.114337558605"                                                   |
| 5      | Neprilysin,"MME","P08473","ChEMBL1944","Protease","0.114337558605"                                                                |
| 6      | Delta opioid receptor,"OPRD1","P41143","ChEMBL236","Family A G protein-coupled receptor","0.114337558605"                         |
| 7      | Integrin alpha-V/beta-3,"ITGAV ITGB3","P06756 P05106","ChEMBL1907598","Membrane receptor","0.106099949133"                        |
| 8      | Leucine aminopeptidase,"LAP3","P28838","ChEMBL3965","Protease","0.106099949133"                                                   |
| 9      | Aminopeptidase N,"ANPEP","P15144","ChEMBL1907","Protease","0.106099949133"                                                        |
| 10     | Integrin alpha-4/beta-1,"ITGB1 ITGA4","P05556 P13612","ChEMBL1907599","Membrane receptor","0.106099949133"                        |
| 11     | Inhibitor of apoptosis protein 3,"XIAP","P98170","ChEMBL4198","Other cytosolic protein","0.106099949133"                          |
| 12     | HLA class I histocompatibility antigen A-3,"HLA-A","P04439","ChEMBL2632","Surface antigen","0.106099949133"                       |
| 13     | Protein farnesyltransferase,"FNTA FNTB","P49354 P49356","ChEMBL2094108","Enzyme","0.106099949133"                                 |
| 14     | Mu opioid receptor (by homology),"OPRM1","P35372","ChEMBL233","Family A G protein-coupled receptor","0.106099949133"              |
| 15     | Solute carrier family 22 member 6 (by homology),"SLC22A6","Q4U2R8","ChEMBL1641347","Electrochemical transporter","0.106099949133" |
| 16     | Oligopeptide transporter small intestine isoform,"SLC15A1","P46059","ChEMBL4605","Electrochemical transporter","0.0978745343258"  |
| 17     | Neurokinin 1 receptor (by homology),"TACR1","P25103","ChEMBL249","Family A G protein-coupled receptor","0.0978745343258"          |
| 18     | Nitric oxide synthase, inducible,"NOS2","P35228","ChEMBL4481","Enzyme","0.0978745343258"                                          |
| 19     | Cyclin-dependent kinase 4/cyclin D1,"CCND1 CDK4","P24385 P11802","ChEMBL1907601","Kinase","0.0978745343258"                       |
| 20     | CDK2/Cyclin A,"CCNA2 CDK2","P20248 P24941","ChEMBL3038469","Kinase","0.0978745343258"                                             |
| 21     | Neurotensin receptor 1 (by homology),"NTSR1","P30989","ChEMBL4123","Family A G protein-coupled receptor","0.0978745343258"        |
| 22     | Leukotriene A4 hydrolase,"LTA4H","P09960","ChEMBL4618","Protease","0.0978745343258"                                               |
| 23     | Tyrosine-protein kinase SRC,"SRC","P12931","ChEMBL267","Kinase","0.0978745343258"                                                 |
| 24     | Matrix metalloproteinase 2,"MMP2","P08253","ChEMBL333","Protease","0.0978745343258"                                               |
| 25     | HMG-CoA reductase,"HMGCR","P04035","ChEMBL402","Oxidoreductase","0.0978745343258"                                                 |
| 26     | Aminopeptidase B (by homology),"RNPEP","Q9H4A4","ChEMBL2432","Protease","0.0978745343258"                                         |
| 27     | Beta-secretase 1,"BACE1","P56817","ChEMBL4822","Protease","0.0978745343258"                                                       |
| 28     | Formyl peptide receptor 1,"FPR1","P21462","ChEMBL3359","Family A G protein-coupled receptor","0.0978745343258"                    |
| 29     | Integrin alpha-IIb/beta-3,"ITGA2B ITGB3","P08514 P05106","ChEMBL2093869","Membrane receptor","0.0978745343258"                    |
| 30     | Chromobox protein homolog 7,"CBX7","O95931","ChEMBL1764946","Reader","0.0978745343258","0 / 19 Â Â Â Â "                          |

|    |                                                                                                                                           |
|----|-------------------------------------------------------------------------------------------------------------------------------------------|
| 31 | E3 SUMO-protein ligase CBX4,"CBX4","O00257","ChEMBL3232685","Enzyme","0.0978745343258"                                                    |
| 32 | Neuropeptide FF receptor 1,"NPFFR1","Q9GZQ6","ChEMBL5951","Family A G protein-coupled receptor","0.0978745343258"                         |
| 33 | Neuropeptide FF receptor 2,"NPFFR2","Q9Y5X5","ChEMBL5952","Family A G protein-coupled receptor","0.0978745343258"                         |
| 34 | Dipeptidyl peptidase IV,"DPP4","P27487","ChEMBL284","Protease","0.0978745343258"                                                          |
| 35 | Neurotensin receptor 2,"NTSR2","O95665","ChEMBL2514","Family A G protein-coupled receptor","0.0978745343258"                              |
| 36 | Dopamine transporter (by homology),"SLC6A3","Q01959","ChEMBL238","Electrochemical transporter","0.0978745343258"                          |
| 37 | Calcitonin gene-related peptide type 1 receptor,"CALCRL","Q16602","ChEMBL3798","Family B G protein-coupled receptor","0.0978745343258"    |
| 38 | Kappa Opioid receptor,"OPRK1","P41145","ChEMBL237","Family A G protein-coupled receptor","0.0978745343258"                                |
| 39 | Signal transducer and activator of transcription 3,"STAT3","P40763","ChEMBL4026","Transcription factor","0.0978745343258"                 |
| 40 | Proenkephalin B,"PDYN","P01213","ChEMBL2227","Other ion channel","0.0978745343258"                                                        |
| 41 | Epoxide hydratase,"EPHX2","P34913","ChEMBL2409","Protease","0.0978745343258"                                                              |
| 42 | Beta secretase 2,"BACE2","Q9Y5Z0","ChEMBL2525","Protease","0.0978745343258"                                                               |
| 43 | Thyrotropin-releasing hormone receptor (by homology),"TRHR","P34981","ChEMBL1810","Family A G protein-coupled receptor","0.0978745343258" |
| 44 | Bradykinin B1 receptor,"BDKRB1","P46663","ChEMBL4308","Family A G protein-coupled receptor","0.0978745343258"                             |
| 45 | Ribonucleoside-diphosphate reductase M1 chain (by homology),"RRM1","P23921","ChEMBL1830","Oxidoreductase","0.0978745343258"               |
| 46 | Renin,"REN","P00797","ChEMBL286","Protease","0.0978745343258"                                                                             |
| 47 | Dipeptidyl peptidase VIII,"DPP8","Q6V1X1","ChEMBL4657","Protease","0.0978745343258"                                                       |
| 48 | Neurokinin 2 receptor,"TACR2","P21452","ChEMBL2327","Family A G protein-coupled receptor","0.0978745343258"                               |
| 49 | Carboxypeptidase B2 isoform A,"CPB2","Q96IY4","ChEMBL3419","Protease","0.0978745343258"                                                   |
| 50 | NAD-dependent deacetylase sirtuin 2,"SIRT2","Q8IXJ6","ChEMBL4462","Eraser","0.0978745343258"                                              |
| 51 | Kallikrein 1,"KLK1","P06870","ChEMBL2319","Protease","0.0978745343258"                                                                    |
| 52 | Integrin alpha-5/beta-1,"ITGB1 ITGA5","P05556 P08648","ChEMBL2095226","Membrane receptor","0.0978745343258"                               |
| 53 | Baculoviral IAP repeat-containing protein 3,"BIRC3","Q13489","ChEMBL5335","Enzyme","0.0978745343258"                                      |
| 54 | Baculoviral IAP repeat-containing protein 2,"BIRC2","Q13490","ChEMBL5462","Enzyme","0.0978745343258"                                      |
| 55 | Vasopressin V1a receptor (by homology),"AVPR1A","P37288","ChEMBL1889","Family A G protein-coupled receptor","0.0978745343258"             |
| 56 | Oxytocin receptor (by homology),"OXTR","P30559","ChEMBL2049","Family A G protein-coupled receptor","0.0978745343258"                      |
| 57 | MAP kinase-activated protein kinase 2,"MAPKAPK2","P49137","ChEMBL2208","Kinase","0.0978745343258"                                         |
| 58 | Xaa-Pro dipeptidase,"PEPD","P12955","ChEMBL4185","Protease","0.0978745343258"                                                             |
| 59 | Xaa-Pro aminopeptidase 2,"XPNPEP2","O43895","ChEMBL4610","Protease","0.0978745343258"                                                     |
| 60 | Angiotensin-converting enzyme 2,"ACE2","Q9BYF1","ChEMBL3736","Protease","0.0978745343258"                                                 |
| 61 | Disks large homolog 4,"DLG4","P78352","ChEMBL5666","Unclassified protein","0.0978745343258"                                               |
| 62 | Sigma opioid receptor,"SIGMAR1","Q99720","ChEMBL287","Membrane receptor","0.0978745343258"                                                |
| 63 | Thrombin,"F2","P00734","ChEMBL204","Protease","0.0978745343258"                                                                           |

|    |                                                                                                                                                 |
|----|-------------------------------------------------------------------------------------------------------------------------------------------------|
| 64 | Dipeptidyl peptidase IX,"DPP9","Q86TI2","ChEMBL4793","Protease","0.0978745343258"                                                               |
| 65 | Endothelin receptor ET-A,"EDNRA","P25101","ChEMBL252","Family A G protein-coupled receptor","0.0978745343258"                                   |
| 66 | Pyroglutamylated RFamide peptide receptor,"QRFPR","Q96P65","ChEMBL5852","Family A G protein-coupled receptor","0.0978745343258"                 |
| 67 | Sphingosine kinase 1,"SPHK1","Q9NYA1","ChEMBL4394","Enzyme","0.0978745343258"                                                                   |
| 68 | Atrial natriuretic factor,"NPPA","P01160","ChEMBL1293193","Unclassified protein","0.0978745343258"                                              |
| 69 | HLA class II histocompatibility antigen DRB1-1,"HLA-DRB1","P04229","ChEMBL1943","Surface antigen","0.0978745343258"                             |
| 70 | Galanin receptor 1 (by homology),"GALR1","P47211","ChEMBL4894","Family A G protein-coupled receptor","0.0978745343258"                          |
| 71 | Neurotensin receptor 3,"SORT1","Q99523","ChEMBL3091","Membrane receptor","0.0978745343258"                                                      |
| 72 | Endothelin-converting enzyme 1,"ECE1","P42892","ChEMBL4791","Protease","0.0978745343258"                                                        |
| 73 | Gamma-secretase,"PSEN2 PSENEN NCSTN APh1A PSEN1 APh1B","P49810 Q9NZ42 Q92542 Q96BI3 P49768 Q8WW43","ChEMBL2094135","Protease","0.0978745343258" |
| 74 | Cholecystokinin B receptor,"CCKBR","P32239","ChEMBL298","Family A G protein-coupled receptor","0.0978745343258"                                 |
| 75 | Xaa-Pro aminopeptidase 1,"XPNPEP1","Q9NQW7","ChEMBL3782","Protease","0.0978745343258"                                                           |
| 76 | C-X-C chemokine receptor type 7,"ACKR3","P25106","ChEMBL2010631","Family A G protein-coupled receptor","0.0978745343258"                        |
| 77 | Max-like protein X,"MLX","Q9UH92","ChEMBL2062357","Unclassified protein","0.0978745343258"                                                      |
| 78 | Furin,"FURIN","P09958","ChEMBL2611","Protease","0.0978745343258"                                                                                |
| 79 | Cathepsin D,"CTSD","P07339","ChEMBL2581","Protease","0.0978745343258"                                                                           |
| 80 | Cathepsin E,"CTSE","P14091","ChEMBL3092","Protease","0.0978745343258"                                                                           |
| 81 | Vasopressin V2 receptor (by homology),"AVPR2","P30518","ChEMBL1790","Family A G protein-coupled receptor","0.0978745343258"                     |
| 82 | Lysine-specific demethylase 4A,"KDM4A","O75164","ChEMBL5896","Eraser","0.0978745343258"                                                         |
| 83 | Lysine-specific demethylase 4C,"KDM4C","Q9H3R0","ChEMBL6175","Eraser","0.0978745343258"                                                         |
| 84 | Alkaline ceramidase 2,"ACER2","Q5QJU3","ChEMBL2331067","Enzyme","0.0978745343258"                                                               |
| 85 | Acid ceramidase,"ASAH1","Q13510","ChEMBL5463","Enzyme","0.0978745343258"                                                                        |
| 86 | Cyclin-dependent kinase 2,"CDK2","P24941","ChEMBL301","Kinase","0.0978745343258"                                                                |
| 87 | Ghrelin receptor,"GHSR","Q92847","ChEMBL4616","Family A G protein-coupled receptor","0.0978745343258"                                           |
| 88 | MAP kinase ERK2,"MAPK1","P28482","ChEMBL4040","Kinase","0.0978745343258"                                                                        |
| 89 | Peptidyl-glycine alpha-amidating monooxygenase,"PAM","P19021","ChEMBL2544","Enzyme","0.0978745343258"                                           |
| 90 | Mas-related G-protein coupled receptor member X1 (by homology),"MRGPRX1","Q96LB2","ChEMBL5850","Unclassified protein","0.0978745343258"         |
| 91 | Ephrin type-A receptor 2,"EPHA2","P29317","ChEMBL2068","Kinase","0.0978745343258"                                                               |
| 92 | Hydroxycarboxylic acid receptor 2,"HCAR2","Q8TDS4","ChEMBL3785","Family A G protein-coupled receptor","0.0978745343258"                         |
| 93 | Appetite-regulating hormone,"GHRL","Q9UBU3","ChEMBL1921664","Unclassified protein","0.0978745343258"                                            |
| 94 | HLA class II histocompatibility antigen DRB3-1,"HLA-DRB3","P79483","ChEMBL3460","Surface antigen","0.0978745343258"                             |
| 95 | Serine/threonine-protein kinase MST2,"STK3","Q13188","ChEMBL4708","Kinase","0.0978745343258"                                                    |

|     |                                                                                                              |
|-----|--------------------------------------------------------------------------------------------------------------|
| 96  | Serine/threonine-protein kinase Aurora-A,"AURKA","O14965","ChEMBL4722","Kinase","0.0978745343258"            |
| 97  | Melanocortin receptor 4,"MC4R","P32245","ChEMBL259","Family A G protein-coupled receptor","0.0978745343258"  |
| 98  | Melanocortin receptor 3,"MC3R","P41968","ChEMBL4644","Family A G protein-coupled receptor","0.0978745343258" |
| 99  | Cyclophilin A,"PPIA","P62937","ChEMBL1949","Isomerase","0.0978745343258"                                     |
| 100 | Serine/threonine-protein kinase PIM1,"PIM1","P11309","ChEMBL2147","Kinase","0.0978745343258"                 |

**Table S8.** Predicted targets for DF peptide. Red font indicates 15 most likely targets.

| Order: | "Target","Common name","Uniprot ID","ChEMBL ID","Target Class","Probability"                                                          |
|--------|---------------------------------------------------------------------------------------------------------------------------------------|
| 1      | Calpain 1,"CAPN1","P07384","CHEMBL3891","Protease","0.149732593856"                                                                   |
| 2      | Angiotensin-converting enzyme,"ACE","P12821","CHEMBL1808","Protease","0.116965063224"                                                 |
| 3      | Neprilysin,"MME","P08473","CHEMBL1944","Protease","0.108770969359"                                                                    |
| 4      | Ribonucleoside-diphosphate reductase M1 chain (by homology),"RRM1","P23921","CHEMBL1830","Oxidoreductase","0.100578902067"            |
| 5      | Neurokinin 2 receptor,"TACR2","P21452","CHEMBL2327","Family A G protein-coupled receptor","0.100578902067"                            |
| 6      | Beta-secretase 1,"BACE1","P56817","CHEMBL4822","Protease","0.100578902067"                                                            |
| 7      | Delta opioid receptor (by homology),"OPRD1","P41143","CHEMBL236","Family A G protein-coupled receptor","0.100578902067"               |
| 8      | Tyrosyl-tRNA synthetase,"YARS","P54577","CHEMBL3179","Enzyme","0.100578902067"                                                        |
| 9      | Calcitonin gene-related peptide type 1 receptor,"CALCRL","Q16602","CHEMBL3798","Family B G protein-coupled receptor","0.100578902067" |
| 10     | HMG-CoA reductase,"HMGCR","P04035","CHEMBL402","Oxidoreductase","0.100578902067","0 / 14Â Â Â Â "                                     |
| 11     | Endothelin receptor ET-A,"EDNRA","P25101","CHEMBL252","Family A G protein-coupled receptor","0.100578902067"                          |
| 12     | Inhibitor of apoptosis protein 3,"XIAP","P98170","CHEMBL4198","Other cytosolic protein","0.100578902067"                              |
| 13     | HLA class I histocompatibility antigen A-3,"HLA-A","P04439","CHEMBL2632","Surface antigen","0.100578902067"                           |
| 14     | Beta secretase 2,"BACE2","Q9Y5Z0","CHEMBL2525","Protease","0.100578902067"                                                            |
| 15     | Leucine aminopeptidase,"LAP3","P28838","CHEMBL3965","Protease","0.100578902067"                                                       |
| 16     | Mu opioid receptor (by homology),"OPRM1","P35372","CHEMBL233","Family A G protein-coupled receptor","0.100578902067"                  |
| 17     | Metabotropic glutamate receptor 3,"GRM3","Q14832","CHEMBL2888","Family C G protein-coupled receptor","0.100578902067"                 |
| 18     | Metabotropic glutamate receptor 2,"GRM2","Q14416","CHEMBL5137","Family C G protein-coupled receptor","0.100578902067"                 |
| 19     | Solute carrier family 22 member 6 (by homology),"SLC22A6","Q4U2R8","CHEMBL1641347","Electrochemical transporter","0.100578902067"     |
| 20     | Gamma-glutamylcysteine synthetase,"GCLC","P48506","CHEMBL4055","Enzyme","0.100578902067"                                              |
| 21     | Integrin alpha-4/beta-1,"ITGB1 ITGA4","P05556 P13612","CHEMBL1907599","Membrane receptor","0.100578902067"                            |
| 22     | Kappa Opioid receptor,"OPRK1","P41145","CHEMBL237","Family A G protein-coupled receptor","0.100578902067"                             |
| 23     | Aminopeptidase N,"ANPEP","P15144","CHEMBL1907","Protease","0.100578902067"                                                            |
| 24     | Glutathione S-transferase kappa 1,"GSTK1","Q9Y2Q3","CHEMBL4491","Enzyme","0.100578902067"                                             |
| 25     | Metabotropic glutamate receptor 6,"GRM6","O15303","CHEMBL4573","Family C G protein-coupled receptor","0.100578902067"                 |
| 26     | Proenkephalin B,"PDYN","P01213","CHEMBL2227","Other ion channel","0.100578902067"                                                     |
| 27     | Peptidyl-prolyl cis-trans isomerase NIMA-interacting 1,"PIN1","Q13526","CHEMBL2288","Enzyme","0.100578902067"                         |
| 28     | Matrix metalloproteinase 3,"MMP3","P08254","CHEMBL283","Protease","0.100578902067"                                                    |
| 29     | Matrix metalloproteinase 1,"MMP1","P03956","CHEMBL332","Protease","0.100578902067"                                                    |
| 30     | Formyl peptide receptor 1,"FPR1","P21462","CHEMBL3359","Family A G protein-coupled receptor","0.100578902067"                         |

|    |                                                                                                                                 |
|----|---------------------------------------------------------------------------------------------------------------------------------|
| 31 | Ephrin type-A receptor 2,"EPHA2","P29317","ChEMBL2068","Kinase","0.100578902067"                                                |
| 32 | Tyrosine-protein kinase SRC,"SRC","P12931","ChEMBL267","Kinase","0.100578902067"                                                |
| 33 | Chromobox protein homolog 7,"CBX7","O95931","ChEMBL1764946","Reader","0.100578902067"                                           |
| 34 | E3 SUMO-protein ligase CBX4,"CBX4","O00257","ChEMBL3232685","Enzyme","0.100578902067"                                           |
| 35 | Protein farnesyltransferase,"FNTA FNTB","P49354 P49356","ChEMBL2094108","Enzyme","0.100578902067"                               |
| 36 | Cholecystikinin B receptor,"CCKBR","P32239","ChEMBL298","Family A G protein-coupled receptor","0.100578902067"                  |
| 37 | Angiotensin II receptor,"AGTR2","P50052","ChEMBL4607","Family A G protein-coupled receptor","0.100578902067"                    |
| 38 | Galanin receptor 1 (by homology),"GALR1","P47211","ChEMBL4894","Family A G protein-coupled receptor","0.100578902067"           |
| 39 | Galanin receptor 2 (by homology),"GALR2","O43603","ChEMBL3176","Family A G protein-coupled receptor","0.100578902067"           |
| 40 | Neurokinin 1 receptor (by homology),"TACR1","P25103","ChEMBL249","Family A G protein-coupled receptor","0.100578902067"         |
| 41 | Oligopeptide transporter small intestine isoform,"SLC15A1","P46059","ChEMBL4605","Electrochemical transporter","0.100578902067" |
| 42 | Tubulin beta-1 chain,"TUBB1","Q9H4B7","ChEMBL1915","Structural protein","0.100578902067"                                        |
| 43 | Epoxide hydratase (by homology),"EPHX2","P34913","ChEMBL2409","Protease","0.100578902067"                                       |
| 44 | Glutamate receptor ionotropic, AMPA 2,"GRIA2","P42262","ChEMBL4016","Ligand-gated ion channel","0.100578902067"                 |
| 45 | Excitatory amino acid transporter 2,"SLC1A2","P43004","ChEMBL4973","Electrochemical transporter","0.100578902067"               |
| 46 | Carboxypeptidase A1,"CPA1","P15085","ChEMBL2088","Protease","0.100578902067"                                                    |
| 47 | Angiotensin-converting enzyme 2,"ACE2","Q9BYF1","ChEMBL3736","Protease","0.100578902067"                                        |
| 48 | HLA class II histocompatibility antigen DRB3-1,"HLA-DRB3","P79483","ChEMBL3460","Surface antigen","0.100578902067"              |
| 49 | Interleukin-1 beta,"IL1B","P01584","ChEMBL1909490","Secreted protein","0.100578902067"                                          |
| 50 | Oxytocin receptor (by homology),"OXTR","P30559","ChEMBL2049","Family A G protein-coupled receptor","0.100578902067"             |
| 51 | ADAM17,"ADAM17","P78536","ChEMBL3706","Protease","0.100578902067"                                                               |
| 52 | Glutamate receptor ionotropic kainate 3,"GRIK3","Q13003","ChEMBL3684","Ligand-gated ion channel","0.100578902067"               |
| 53 | Cyclin-dependent kinase 4/cyclin D1,"CCND1 CDK4","P24385 P11802","ChEMBL1907601","Kinase","0.100578902067"                      |
| 54 | CDK2/Cyclin A,"CCNA2 CDK2","P20248 P24941","ChEMBL3038469","Kinase","0.100578902067"                                            |
| 55 | MAP kinase ERK2,"MAPK1","P28482","ChEMBL4040","Kinase","0.100578902067"                                                         |
| 56 | Neurotensin receptor 1 (by homology),"NTSR1","P30989","ChEMBL4123","Family A G protein-coupled receptor","0.100578902067"       |
| 57 | Neuropeptide FF receptor 1,"NPFFR1","Q9GZQ6","ChEMBL5951","Family A G protein-coupled receptor","0.100578902067"                |
| 58 | Neuropeptide FF receptor 2,"NPFFR2","Q9Y5X5","ChEMBL5952","Family A G protein-coupled receptor","0.100578902067"                |
| 59 | Cathepsin (B and K),"CTSB","P07858","ChEMBL4072","Protease","0.100578902067"                                                    |
| 60 | HLA class II histocompatibility antigen DRB1-1,"HLA-DRB1","P04229","ChEMBL1943","Surface antigen","0.100578902067"              |
| 61 | Tryptase beta-1,"TPSAB1","Q15661","ChEMBL2617","Protease","0.100578902067"                                                      |
| 62 | Sigma opioid receptor,"SIGMAR1","Q99720","ChEMBL287","Membrane receptor","0.100578902067"                                       |
| 63 | Atrial natriuretic factor,"NPPA","P01160","ChEMBL1293193","Unclassified protein","0.100578902067"                               |

|    |                                                                                                                                         |
|----|-----------------------------------------------------------------------------------------------------------------------------------------|
| 64 | Cyclin-dependent kinase 2/cyclin A,"CDK2 CCNA1 CCNA2","P24941 P78396 P20248","CHEMBL2094128","Other cytosolic protein","0.100578902067" |
| 65 | Betaine--homocysteine S-methyltransferase 1,"BHMT","Q93088","CHEMBL4328","Enzyme","0.100578902067"                                      |
| 66 | Kallikrein 1,"KLK1","P06870","CHEMBL2319","Protease","0.100578902067"                                                                   |
| 67 | Neurotensin receptor 2,"NTSR2","O95665","CHEMBL2514","Family A G protein-coupled receptor","0.100578902067"                             |
| 68 | Cathepsin L,"CTSL","P07711","CHEMBL3837","Protease","0.100578902067"                                                                    |
| 69 | Cyclooxygenase-2,"PTGS2","P35354","CHEMBL230","Oxidoreductase","0.100578902067"                                                         |
| 70 | Signal transducer and activator of transcription 3,"STAT3","P40763","CHEMBL4026","Transcription factor","0.100578902067"                |
| 71 | Integrin alpha-IIb/beta-3,"ITGA2B ITGB3","P08514 P05106","CHEMBL2093869","Membrane receptor","0.100578902067"                           |
| 72 | Histone deacetylase 1,"HDAC1","Q13547","CHEMBL325","Eraser","0.100578902067"                                                            |
| 73 | Cathepsin K,"CTSK","P43235","CHEMBL268","Protease","0.100578902067"                                                                     |
| 74 | Neurokinin 3 receptor,"TACR3","P29371","CHEMBL4429","Family A G protein-coupled receptor","0.100578902067"                              |
| 75 | Geranylgeranyl transferase type I,"PGGT1B FNTA","P53609 P49354","CHEMBL2095164","Enzyme","0.100578902067"                               |
| 76 | Elastase 1,"CELA1","Q9UNI1","CHEMBL3000","Protease","0.100578902067"                                                                    |
| 77 | Cathepsin G,"CTSG","P08311","CHEMBL4071","Protease","0.100578902067"                                                                    |
| 78 | Beta-chymotrypsin,"CTRB1","P17538","CHEMBL4796","Protease","0.100578902067"                                                             |
| 79 | Dipeptidyl peptidase VIII,"DPP8","Q6V1X1","CHEMBL4657","Protease","0.100578902067"                                                      |
| 80 | Dipeptidyl peptidase I,"CTSC","P53634","CHEMBL2252","Protease","0.100578902067"                                                         |
| 81 | Bradykinin B1 receptor,"BDKRB1","P46663","CHEMBL4308","Family A G protein-coupled receptor","0.100578902067"                            |

**Table S9.** Predicted targets for DR peptide. Red font indicates 15 most likely targets.

| Order: | "Target","Common name","Uniprot ID","ChEMBL ID","Target Class","Probability"                                            |
|--------|-------------------------------------------------------------------------------------------------------------------------|
| 1      | Complement factor B,"CFB","P00751","CHEMBL5731","Protease","0.108770969359"                                             |
| 2      | Furin,"FURIN","P09958","CHEMBL2611","Protease","0.108770969359"                                                         |
| 3      | Integrin alpha-IIb/beta-3,"ITGA2B ITGB3","P08514 P05106","CHEMBL2093869","Membrane receptor","0.108770969359"           |
| 4      | Integrin alpha-V/beta-5,"ITGB5 ITGAV","P18084 P06756","CHEMBL2096675","Membrane receptor","0.108770969359"              |
| 5      | Hepatocyte growth factor activator,"HGFAC","Q04756","CHEMBL3351190","Unclassified protein","0.108770969359"             |
| 6      | Subtilisin/kexin type 6,"PCSK6","P29122","CHEMBL2951","Protease","0.108770969359"                                       |
| 7      | Neurotensin receptor 2,"NTSR2","O95665","CHEMBL2514","Family A G protein-coupled receptor","0.108770969359"             |
| 8      | Neurotensin receptor 1,"NTSR1","P30989","CHEMBL4123","Family A G protein-coupled receptor","0.108770969359"             |
| 9      | Disintegrin and metalloproteinase domain-containing protein 8,"ADAM8","P78325","CHEMBL5665","Protease","0.100578902067" |
| 10     | Neuropilin-1 (by homology),"NRP1","O14786","CHEMBL5174","Secreted protein","0.100578902067"                             |
| 11     | Thrombin and coagulation factor X,"F10","P00742","CHEMBL244","Protease","0.100578902067"                                |
| 12     | WD repeat-containing protein 5,"WDR5","P61964","CHEMBL1075317","Unclassified protein","0.100578902067"                  |
| 13     | c-Jun N-terminal kinase 1,"MAPK8","P45983","CHEMBL2276","Kinase","0.100578902067"                                       |
| 14     | Epoxide hydratase (by homology),"EPHX2","P34913","CHEMBL2409","Protease","0.100578902067"                               |
| 15     | Integrin alpha-V/beta-3,"ITGAV ITGB3","P06756 P05106","CHEMBL1907598","Membrane receptor","0.100578902067"              |
| 16     | Integrin alpha-5/beta-1,"ITGB1 ITGA5","P05556 P08648","CHEMBL2095226","Membrane receptor","0.100578902067"              |
| 17     | Renin,"REN","P00797","CHEMBL286","Protease","0.100578902067"                                                            |
| 18     | Transcription factor AP1,"FOS JUN","P01100 P05412","CHEMBL2111421","Transcription factor","0.100578902067"              |
| 19     | Plasminogen,"PLG","P00747","CHEMBL1801","Protease","0.100578902067"                                                     |
| 20     | Thrombin,"F2","P00734","CHEMBL204","Protease","0.100578902067"                                                          |
| 21     | Proteinase-activated receptor 2,"F2RL1","P55085","CHEMBL5963","Family A G protein-coupled receptor","0.100578902067"    |
| 22     | Caspase-8,"CASP8","Q14790","CHEMBL3776","Protease","0.100578902067"                                                     |
| 23     | HLA class I histocompatibility antigen A-3,"HLA-A","P04439","CHEMBL2632","Surface antigen","0.100578902067"             |
| 24     | Vitronectin receptor alpha,"ITGAV","P06756","CHEMBL3660","Membrane receptor","0.100578902067"                           |
| 25     | Disks large homolog 4,"DLG4","P78352","CHEMBL5666","Unclassified protein","0.100578902067"                              |
| 26     | Sodium/glucose cotransporter 1,"SLC5A1","P13866","CHEMBL4979","Electrochemical transporter","0.100578902067"            |
| 27     | Cathepsin K,"CTSK","P43235","CHEMBL268","Protease","0.100578902067"                                                     |
| 28     | Transmembrane protease serine 6,"TMPRSS6","Q8IU80","CHEMBL1795139","Protease","0.100578902067"                          |
| 29     | Serine protease hepsin,"HPN","P05981","CHEMBL2079849","Protease","0.100578902067"                                       |
| 30     | Cathepsin (H and K),"CTSH","P09668","CHEMBL2225","Protease","0.100578902067"                                            |

|    |                                                                                                          |
|----|----------------------------------------------------------------------------------------------------------|
| 31 | Matriptase,"ST14","Q9Y5Y6","CHEMBL3018","Protease","0.100578902067"                                      |
| 32 | Cathepsin L,"CTSL","P07711","CHEMBL3837","Protease","0.100578902067"                                     |
| 33 | Calpain 1,"CAPN1","P07384","CHEMBL3891","Protease","0.100578902067"                                      |
| 34 | Cathepsin (B and K),"CTSB","P07858","CHEMBL4072","Protease","0.100578902067"                             |
| 35 | Cathepsin D,"CTSD","P07339","CHEMBL2581","Protease","0.100578902067"                                     |
| 36 | Beta-secretase 1,"BACE1","P56817","CHEMBL4822","Protease","0.100578902067"                               |
| 37 | Pepsinogen C (by homology),"PGC","P20142","CHEMBL2136","Protease","0.100578902067"                       |
| 38 | Cathepsin E,"CTSE","P14091","CHEMBL3092","Protease","0.100578902067"                                     |
| 39 | Pepsin A,"PGA5","P0DJ9","CHEMBL3295","Protease","0.100578902067"                                         |
| 40 | ADAM9,"ADAM9","Q13443","CHEMBL5982","Protease","0.100578902067"                                          |
| 41 | Inhibitor of apoptosis protein 3,"XIAP","P98170","CHEMBL4198","Other cytosolic protein","0.100578902067" |
| 42 | Dipeptidyl peptidase IV,"DPP4","P27487","CHEMBL284","Protease","0.100578902067"                          |

**Table S10.** Predicted targets for GR peptide. Red font indicates 15 most likely targets.

| Order: | "Target","Common name","Uniprot ID","ChEMBL ID","Target Class","Probability"                                                 |
|--------|------------------------------------------------------------------------------------------------------------------------------|
| 1      | Complement factor B,"CFB","P00751","CHEMBL5731","Protease","0.112450964818"                                                  |
| 2      | Furin,"FURIN","P09958","CHEMBL2611","Protease","0.103761755413"                                                              |
| 3      | Neurotensin receptor 2,"NTSR2","O95665","CHEMBL2514","Family A G protein-coupled receptor","0.0864426933852"                 |
| 4      | Neurotensin receptor 1,"NTSR1","P30989","CHEMBL4123","Family A G protein-coupled receptor","0.0864426933852"                 |
| 5      | Subtilisin/kexin type 6,"PCSK6","P29122","CHEMBL2951","Protease","0.0864426933852"                                           |
| 6      | Hepatocyte growth factor activator,"HGFAC","Q04756","CHEMBL3351190","Unclassified protein","0.0864426933852"                 |
| 7      | Neuropilin-1 (by homology),"NRP1","O14786","CHEMBL5174","Secreted protein","0.0690974435253"                                 |
| 8      | WD repeat-containing protein 5,"WDR5","P61964","CHEMBL1075317","Unclassified protein","0.0690974435253"                      |
| 9      | Epoxide hydratase (by homology),"EPHX2","P34913","CHEMBL2409","Protease","0.0690974435253"                                   |
| 10     | Nitric oxide synthase, inducible,"NOS2","P35228","CHEMBL4481","Enzyme","0.0604245879294"                                     |
| 11     | Nitric-oxide synthase, brain,"NOS1","P29475","CHEMBL3568","Enzyme","0.0604245879294"                                         |
| 12     | Proteinase-activated receptor 2,"F2RL1","P55085","CHEMBL5963","Family A G protein-coupled receptor","0.0604245879294"        |
| 13     | Transmembrane protease serine 6,"TMPRSS6","Q8IU80","CHEMBL1795139","Protease","0.0604245879294"                              |
| 14     | Plasminogen,"PLG","P00747","CHEMBL1801","Protease","0.0604245879294"                                                         |
| 15     | Serine protease hepsin,"HPN","P05981","CHEMBL2079849","Protease","0.0604245879294"                                           |
| 16     | Cathepsin (H and K),"CTSH","P09668","CHEMBL2225","Protease","0.0604245879294"                                                |
| 17     | Matriptase,"ST14","Q9Y5Y6","CHEMBL3018","Protease","0.0604245879294"                                                         |
| 18     | Cathepsin L,"CTSL","P07711","CHEMBL3837","Protease","0.0604245879294"                                                        |
| 19     | Calpain 1,"CAPN1","P07384","CHEMBL3891","Protease","0.0604245879294"                                                         |
| 20     | Cathepsin (B and K),"CTSB","P07858","CHEMBL4072","Protease","0.0604245879294"                                                |
| 21     | Thrombin,"F2","P00734","CHEMBL204","Protease","0.0604245879294"                                                              |
| 22     | Nitric-oxide synthase, endothelial,"NOS3","P29474","CHEMBL4803","Enzyme","0.0604245879294"                                   |
| 23     | Dipeptidyl peptidase II,"DPP7","Q9UHL4","CHEMBL3976","Protease","0.0604245879294"                                            |
| 24     | Dipeptidyl peptidase VIII,"DPP8","Q6V1X1","CHEMBL4657","Protease","0.0604245879294"                                          |
| 25     | Dipeptidyl peptidase IV,"DPP4","P27487","CHEMBL284","Protease","0.0604245879294"                                             |
| 26     | Integrin alpha-5/beta-1,"ITGB1 ITGA5","P05556 P08648","CHEMBL2095226","Membrane receptor","0.0604245879294"                  |
| 27     | c-Jun N-terminal kinase 1,"MAPK8","P45983","CHEMBL2276","Kinase","0.0604245879294"                                           |
| 28     | Integrin alpha-V/beta-3,"ITGAV ITGB3","P06756 P05106","CHEMBL1907598","Membrane receptor","0.0604245879294"                  |
| 29     | C3a anaphylatoxin chemotactic receptor,"C3AR1","Q16581","CHEMBL4761","Family A G protein-coupled receptor","0.0604245879294" |
| 30     | Integrin alpha-V/beta-5,"ITGB5 ITGAV","P18084 P06756","CHEMBL2096675","Membrane receptor","0.0604245879294"                  |

|    |                                                                                                                            |
|----|----------------------------------------------------------------------------------------------------------------------------|
| 31 | Muscarinic acetylcholine receptor M4,"CHRM4","P08173","ChEMBL1821","Family A G protein-coupled receptor","0.0604245879294" |
| 32 | Muscarinic acetylcholine receptor M2,"CHRM2","P08172","ChEMBL211","Family A G protein-coupled receptor","0.0604245879294"  |
| 33 | Muscarinic acetylcholine receptor M1,"CHRM1","P11229","ChEMBL216","Family A G protein-coupled receptor","0.0604245879294"  |
| 34 | Tripeptidyl-peptidase 2,"TPP2","P29144","ChEMBL6156","Protease","0.0604245879294"                                          |
| 35 | Disintegrin and metalloproteinase domain-containing protein 8,"ADAM8","P78325","ChEMBL5665","Protease","0.0604245879294"   |
| 36 | HLA class I histocompatibility antigen A-3,"HLA-A","P04439","ChEMBL2632","Surface antigen","0.0604245879294"               |
| 37 | Inhibitor of apoptosis protein 3,"XIAP","P98170","ChEMBL4198","Other cytosolic protein","0.0604245879294"                  |
| 38 | Thrombin and coagulation factor X,"F10","P00742","ChEMBL244","Protease","0.0604245879294"                                  |
| 39 | Tryptase beta-1,"TPSAB1","Q15661","ChEMBL2617","Protease","0.0604245879294"                                                |
